# Supplementary material
Source: PubMed Central journal article supplement (PMC4373654)
Supplement: NIHMS660806-supplement-2.pdf [file NIHMS660806-supplement-2.pdf]

Figure S1. (Related to main text, Fig. 1 and Fig. 2)

## A Microinjection

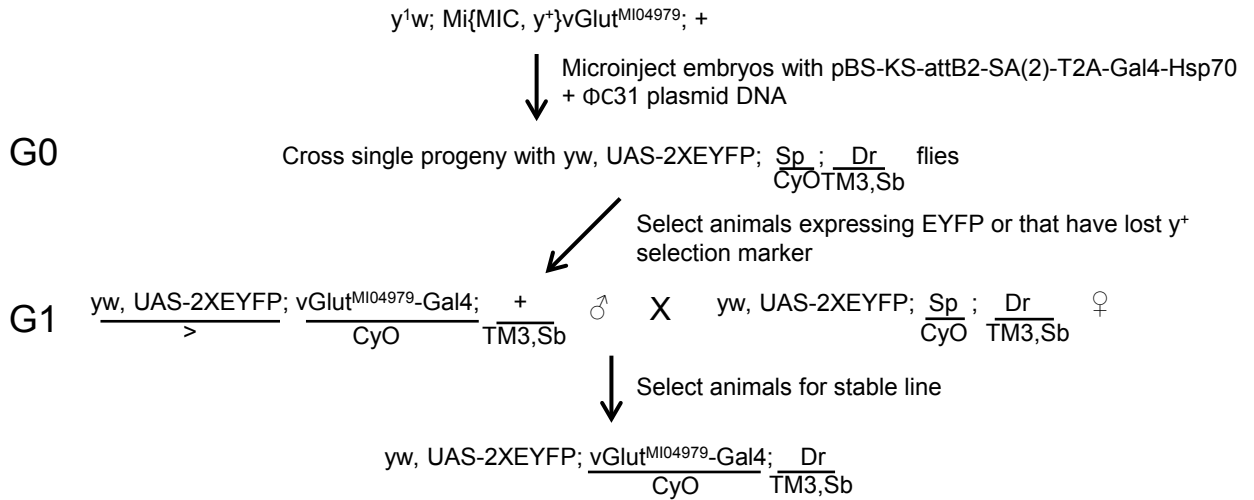

## B In vivo

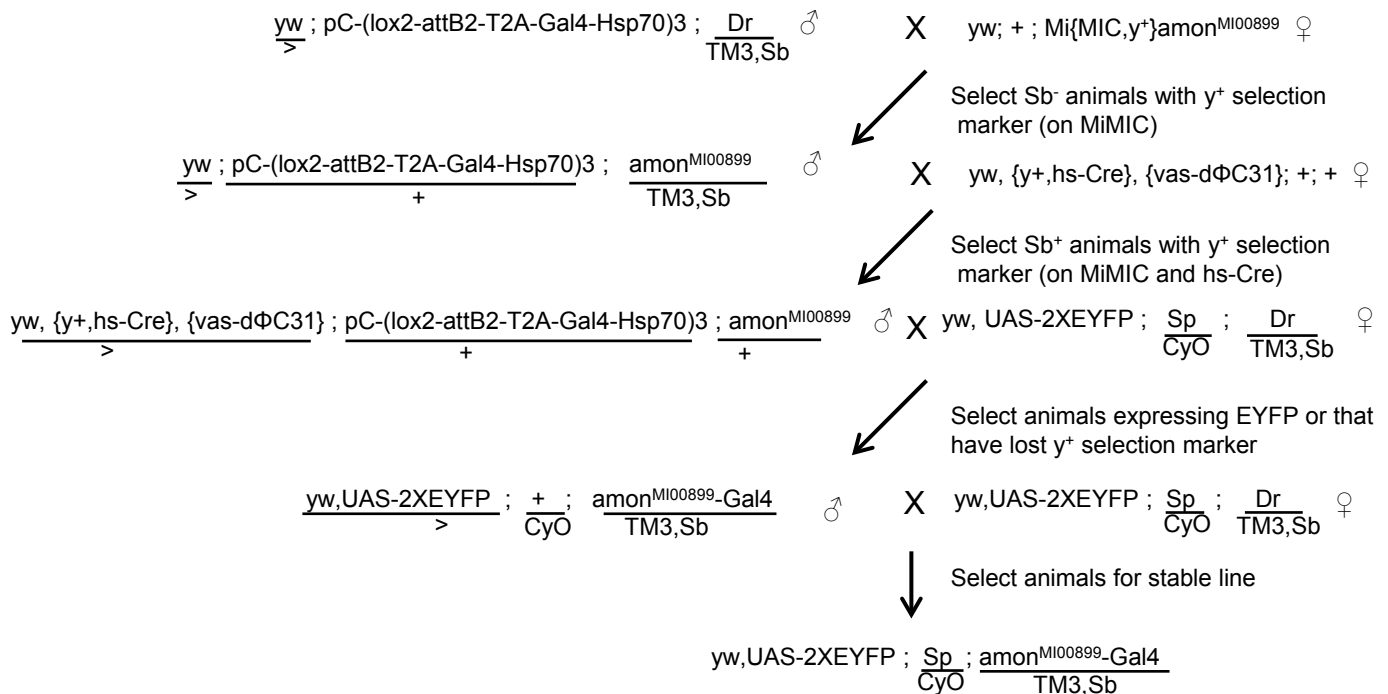

### Figure S1. Methodology for generating Gal4 driver lines from MiMIC lines by embryonic microinjection of Trojan exon constructs or by using the “triplet donor” *in vivo* system

**A)** A Trojan exon plasmid (with the T2A-Gal4 sequence in the correct reading frame) is microinjected into embryos of a fly line bearing a MiMIC insertion ( $vGlut^{MI04979}$  in the example shown). ΦC31 (either co-injected or endogenously expressed) mediates cassette exchange in germ cells, which is accompanied by loss of the  $y^+$  selection marker associated with MiMIC. Adults are crossed singly to flies of a “reporter-balancer line,” and the progeny are screened by fluorescence microscopy. Adult

recombinants are selected to establish stable lines. In cases where fluorescence cannot be easily detected, yellow-bodied ( $y^-$ ) progeny are selected and used to establish stable lines that can be analyzed by genomic PCR or by higher resolution fluorescence microscopy to identify those with T2A-Gal4 insertions. Variations on these methods can be used to identify recombinants for other Trojan exon constructs using the fly lines listed in Table S1. **B)** Using the *in vivo* triplet donor system requires bringing together several genetic components (accomplished as illustrated for the generation of the  $amon^{MI00899}$ -Gal4 line). First, the chromosome containing the MiMIC insertion is combined with the chromosome bearing the triplet donor (lines with the triplet donor on the X, II, and III are available; Table S1). Flies with both components are then crossed to flies from a “dual-recombinase” line, which has both germline-expressing Cre and  $\Phi$ C31 transgenes on X. In the germline of the progeny of this cross, T2A-Gal4 sequences excised from the triplet donor by Cre form DNA circles, which serve as substrates for  $\Phi$ C31-mediated cassette exchange into the MiMIC site. Adult progeny are then crossed to flies from the “reporter-balancer line” for screening as described above at (A).

Figure S2. (Related to Fig. 1B)

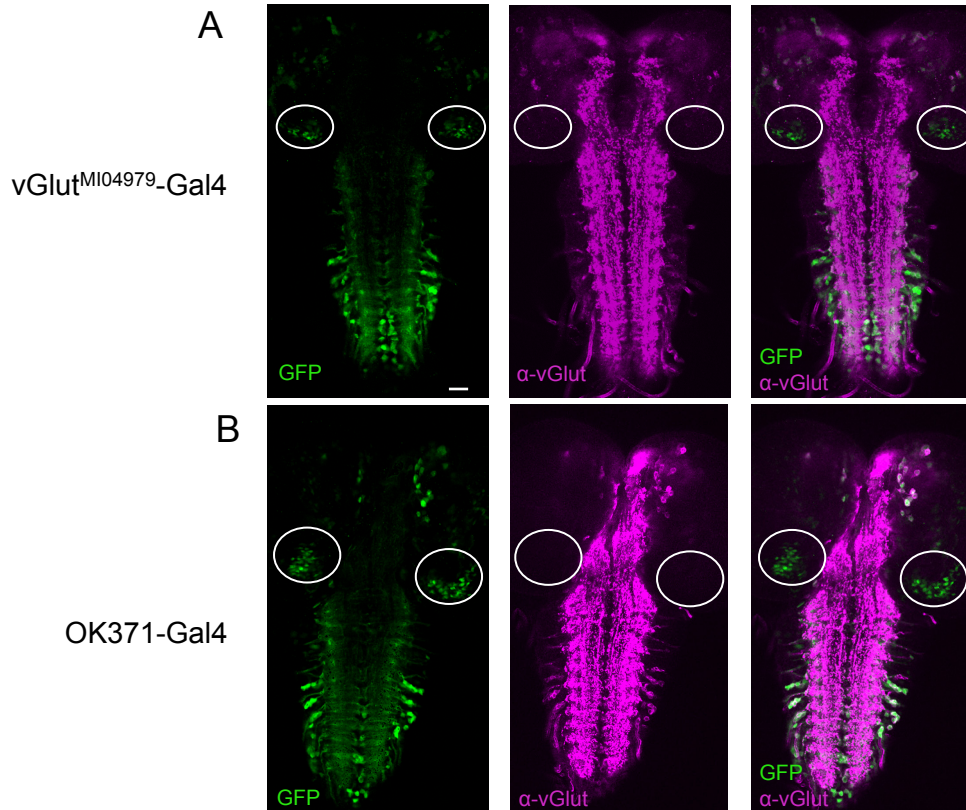

**Figure S2. Glutamatergic drivers detect a subset of neurons not labeled by anti-vGlut antibody**  
**A)** Expression pattern of vGlut<sup>MI04979</sup>- Gal4 line (left, UAS-EGFP) in the larval nervous system, double-labeled with anti-vGlut antibody (middle, magenta). The selected confocal planes show a set of neurons in the optic lobe (circle) that are within the vGlut<sup>MI04979</sup>- Gal4 expression pattern, but are not immunopositive for the anti-vGlut antibody, as seen in the merged image (right). **B)** The expression pattern of the commonly used glutamatergic driver, OK371-Gal4, also labels the same set of optic lobe neurons. Scale bar, 25  $\mu$ m.

Figure S3 (Related to Fig. 2A-B)

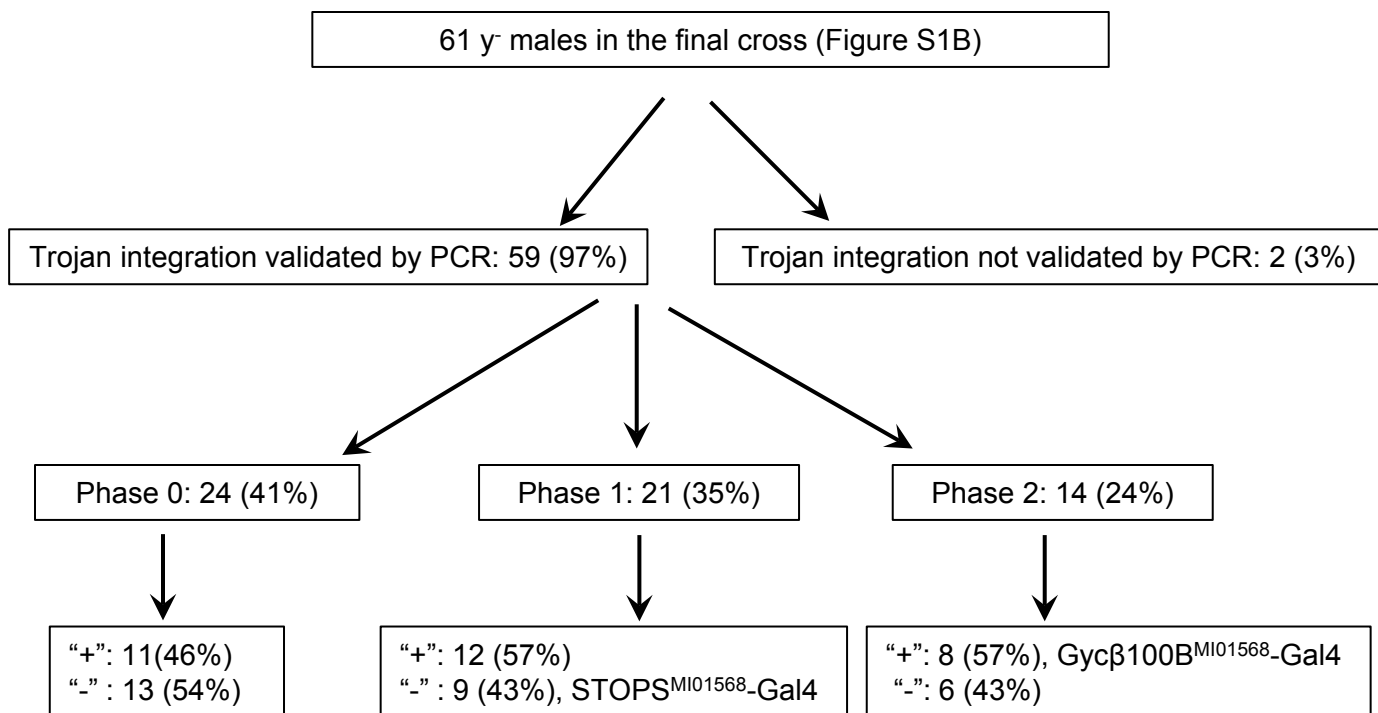

**Figure S3. Analysis of the efficiency of cassette exchange of the three Trojan Gal4 donors into the MI01568 insertion into the *Gycβ100B* gene**

To investigate the overall efficacy of Cre-mediated excision of the three Trojan Gal4 exons of the triplet donor and their ΦC31-mediated reintegration into the MI01568 MiMIC site, we established lines for 61 y- progeny isolated solely on the basis of their loss of the yellow selection marker associated with the original MiMIC insertion (and without regard for their expression of a fluorescence reporter). We used PCR to first validate the successful incorporation of a Trojan exon into the MiMIC-associated attP landing sites (which occurred in 59 of the 61 cases) and then to verify the phases and orientations of the integrated Trojan exons. The number (and percentage) of lines having a given phase and orientation is indicated. “+” and “-” indicate orientation either in, or opposite to, the direction of transcription of the *Gycβ100B* gene, respectively. Little bias was observed for reintegration of any of the cassettes in the two possible orientations.

Figure S4 (Related to Fig. 2C)

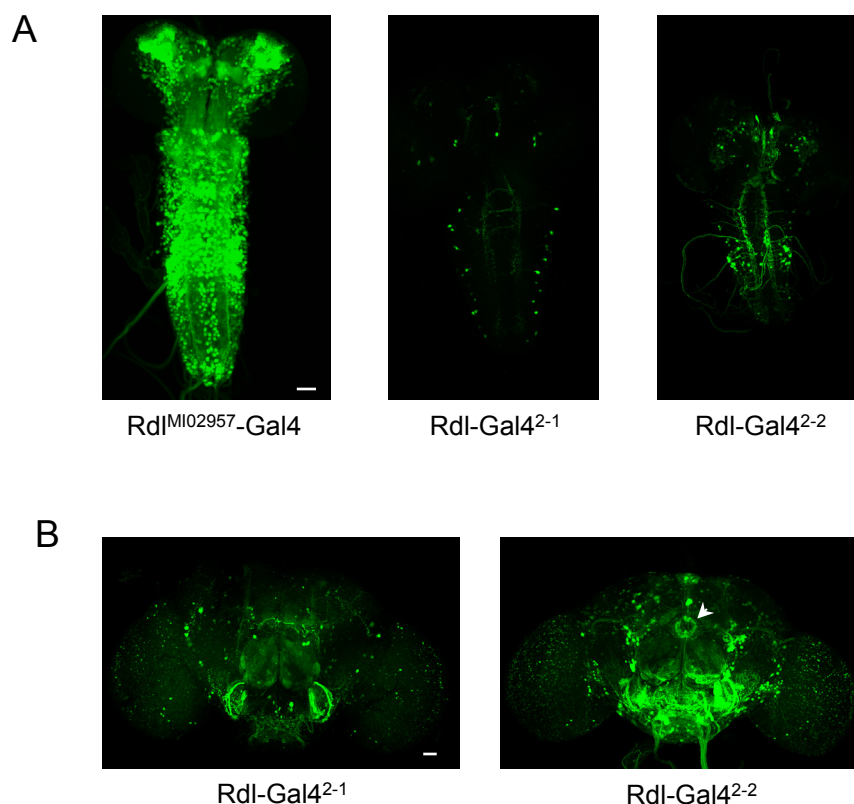

**Figure S4. Comparison of Rdl<sup>MI02957</sup>-Gal4 and two published Rdl-Gal4 drivers.**

**A)** Expression patterns of Rdl<sup>MI02957</sup>-Gal4 and two previously used Rdl-Gal4 driver lines visualized by UAS-EYP in larval CNS wholemounts. Left, Rdl<sup>MI02957</sup>-Gal4; middle, Rdl-Gal4<sup>2-2</sup>, right, Rdl-Gal4<sup>2-2</sup>. Images are volume-rendered confocal micrographs processed using the same acquisition parameters. Substantially fewer neurons are labeled in the preparations from the Rdl-Gal4<sup>2-1</sup> or Rdl-Gal4<sup>2-2</sup> driver lines. **B)** Rdl-Gal4<sup>2-1</sup> (left) and Rdl-Gal4<sup>2-2</sup> (right) expression patterns in adult brain wholemounts (green, UAS-EYFP). Adult brain structures known to strongly express the *Rdl* gene (see Fig. 2C), are, in general, not prominently labeled by these drivers, with the exception of the Ellipsoid Body (arrow, right). Scale bars, 25  $\mu$ m.

Figure S5 (Related to Fig. 2D)

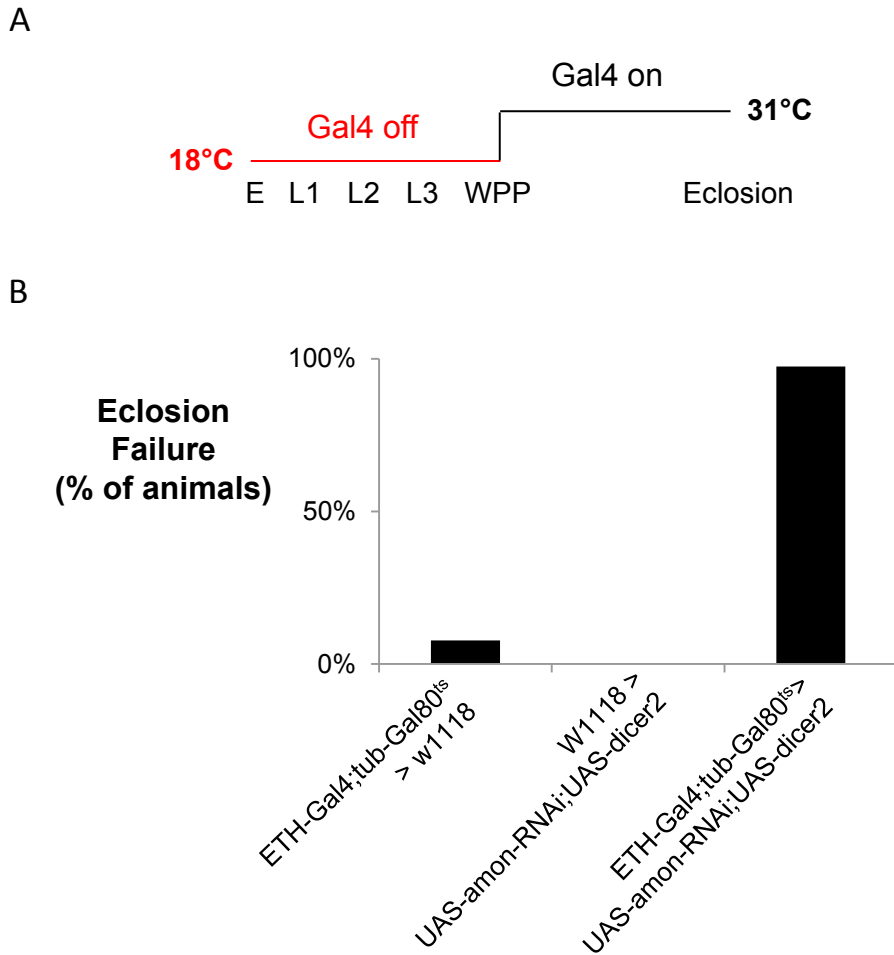

**Figure S5. Knockdown of *amon* gene expression in Inka cells causes ecdysis deficits**

ETH-Gal4 driven expression of UAS-amon-RNAi selectively in the Inka cells led to larval death and apparent ecdysis deficits. To better quantify the mortality, Gal80<sup>ts</sup> was used to temporally regulate the onset of UAS-amon-RNAi expression at the white prepupa stage (WPP) as diagrammed in (A) and the development of all animals was followed. (B) The bar graph shows the percentage of animals that died of eclosion failure for two control genotypes that lacked either UAS-amon-RNAi or the ETH-Gal4 driver and for experimental animals expressing UAS-amon-RNAi and UAS-dicer2 under the control of the ETH-Gal4 driver.

Figure S6 (Related to Discussion, Fig. 1A, and Table 1)

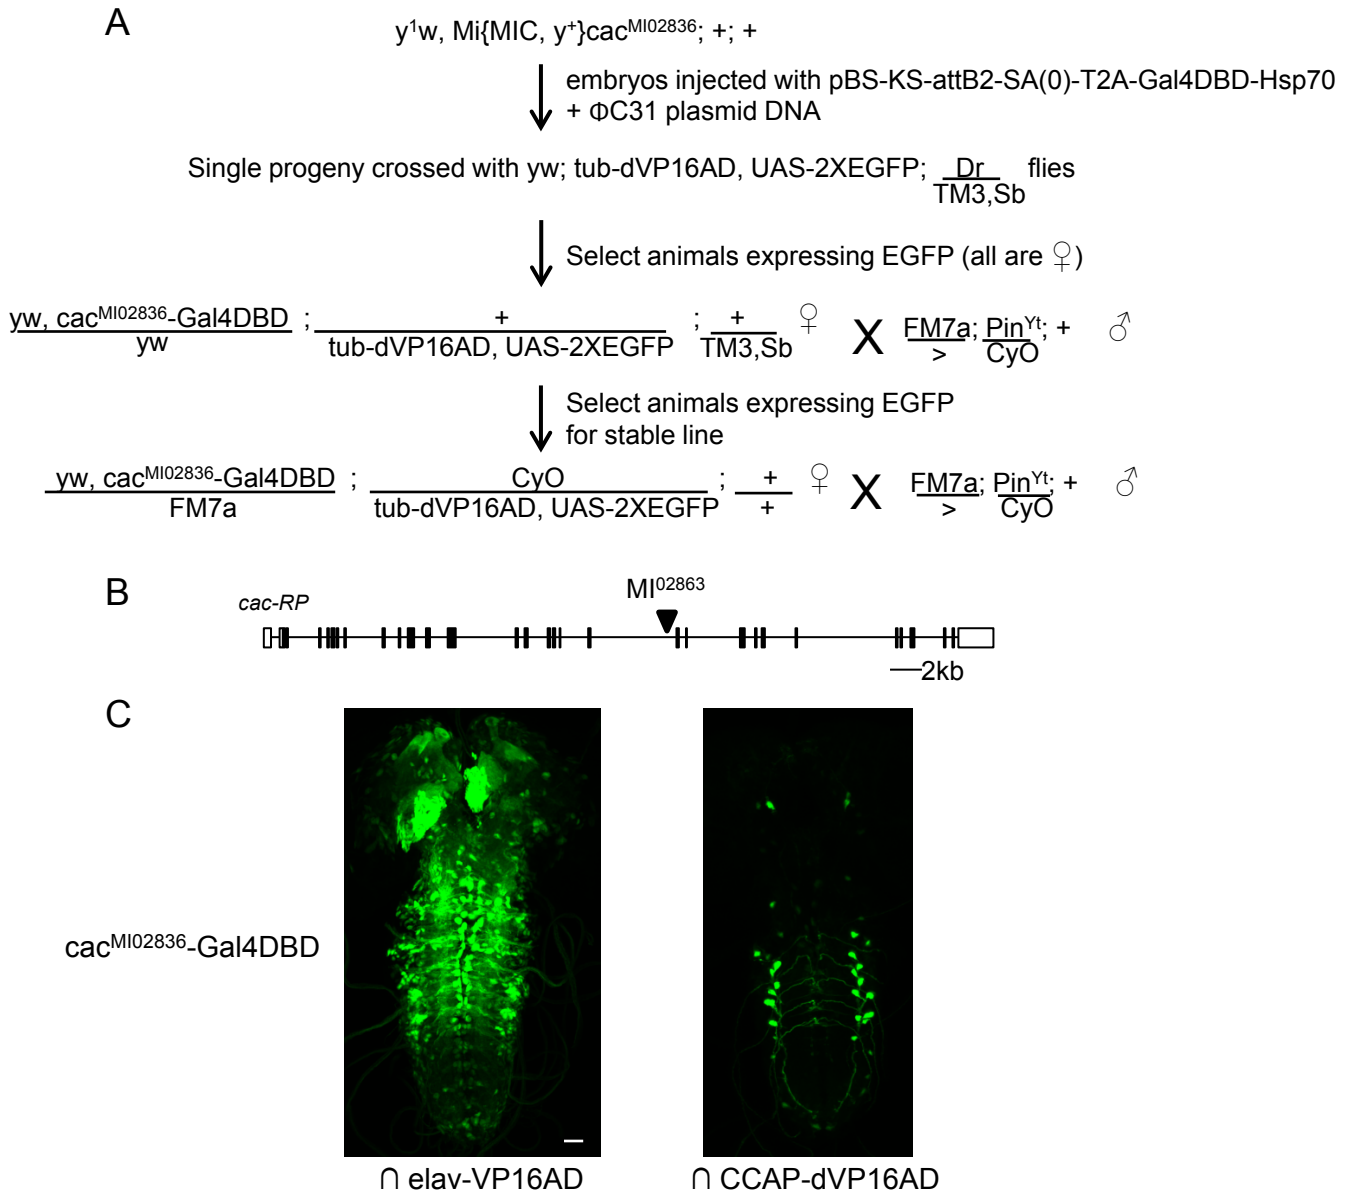

**Figure S6. Generation of a Trojan-MiMIC line on X:  $cac^{MI02836-Gal4DBD}$**

MiMIC insertions into the coding introns of essential genes on the X chromosome require special consideration because truncation and loss of function will be lethal to male animals. **A)** Crossing scheme used to isolate and maintain a T2A-Gal4DBD insertion into the *cacophony* (*cac*) gene, which encodes an essential  $Ca^{++}$  channel  $\alpha$ -subunit in *Drosophila*. This line can be maintained over the FM7a X-chromosome balancer, or alternatively by using an appropriate X-chromosome duplication. **B)** Schematic of the *cac* gene locus, showing the RP splice isoform and the MI02836 MiMIC insertion, which is located in an intron common to all splice isoforms. **C)** Confocal micrographs of the  $cac^{MI02836-Gal4DBD}$  expression pattern in the larval CNS, as revealed by crossing to the pan-neuronal elav-VP16AD hemidriver with UAS-EYFP as a reporter (left), or in the subset of neurons that express the neuropeptide CCAP, as revealed by crossing to a CCAP-dVP16AD hemidriver. The developmental lethality associated with the  $cac^{MI02836}$  insertion was rescued by an X chromosome duplication of the *cac* gene. Fly lines with duplications of X-linked genes have been placed onto chromosome III and are now available for almost every gene on the X-chromosome and can also be used to maintain lethal Trojan-MiMIC lines on X. Scale bar: 25  $\mu$ m.

**Table S1. Fly lines made to facilitate the generation of Trojan effector lines  
(Related to Experimental Procedures)**

|                                                                               | <b>Genotype of Line</b>                                                                | <b>Purpose of Line</b>                                                           |
|-------------------------------------------------------------------------------|----------------------------------------------------------------------------------------|----------------------------------------------------------------------------------|
| <b>Balancer Lines</b>                                                         | yw; Sp/CyO; Dr/TM3,Sb                                                                  | Balance Trojan inserts on II or III                                              |
|                                                                               | C(1)M3,y <sup>2</sup> />;Pin <sup>Yt</sup> /CyO;+ x<br>FM7a/>;Pin <sup>Yt</sup> /CyO;+ | Balance Trojan inserts on X                                                      |
| <b>Lines for Screening Recombinants after ΦC31-mediated Cassette Exchange</b> | yw,UAS-2XEYFP; Sp/Cyo; Dr/TM3,Sb                                                       | Screen Trojan Gal4 recombinants on II or III                                     |
|                                                                               | yw; UAS-2XEGFP; Dr/TM3,Sb                                                              | Screen Trojan Gal4 recombinants on X or III                                      |
|                                                                               | yw; Sp/Cyo; UAS-2XEGFP                                                                 | Screen Trojan Gal4 recombinants on X or II                                       |
|                                                                               | yw,tub-dVP16AD, UAS-2XEYFP; Sp/CyO; Dr/TM3,Sb                                          | Screen Trojan Gal4DBD recombinants on II or III                                  |
|                                                                               | yw; tub-dVP16AD, UAS-2XEGFP; Dr/TM3,Sb                                                 | Screen Trojan Gal4DBD recombinants on X or III                                   |
|                                                                               | yw;tub-Gal4DBD;UAS-2XEGFP                                                              | Screen Trojan dVP16AD or p65AD recombinants on X                                 |
|                                                                               | yw,UAS-2XEYFP;Sp/Cyo;tub-Gal4DBD                                                       | Screen Trojan dVP16AD or p65AD recombinants on II                                |
|                                                                               | yw,UAS-2XEYFP; tub-Gal4DBD; Dr/TM3,Sb                                                  | Screen Trojan dVP16AD or p65AD recombinants on III                               |
| <b>Lines for use in generating Trojan-MiMIC lines by <i>in vivo</i> RMCE</b>  | yw,pC-(loxP2-attB2-SA(0)-T2A-Gal4-Hsp70); +; +                                         | Singlet Donor (phase 0) for <i>in vivo</i> RMCE with MiMIC inserts on II and III |
|                                                                               | yw; pC-(loxP2-attB2-SA(0)-T2A-Gal4-Hsp70); Dr/TM3,Sb                                   | Singlet Donor (phase 0) for <i>in vivo</i> RMCE with MiMIC inserts on X and III  |
|                                                                               | yw; Sp/Cyo; pC-(loxP2-attB2-SA(0)-T2A-Gal4-Hsp70)                                      | Singlet Donor (phase 0) for <i>in vivo</i> RMCE with MiMIC inserts on X and II   |
|                                                                               | yw, pC-(loxP2-attB2-SA(1)-T2A-Gal4-Hsp70); +; +                                        | Singlet Donor (phase 1) for <i>in vivo</i> RMCE with MiMIC inserts on II and III |
|                                                                               | yw; pC-(loxP2-attB2-SA(1)-T2A-Gal4-                                                    | Singlet Donor (phase 1) for <i>in vivo</i>                                       |



|                                                                |                                                                                  |
|----------------------------------------------------------------|----------------------------------------------------------------------------------|
| Hsp70); Dr/TM3,Sb                                              | RMCE with MiMIC inserts on X and III                                             |
| yw; Sp/Cyo; pC-(loxP2-attB2-SA(1)-T2A-Gal4-Hsp70)              | Singlet Donor (phase 1) for <i>in vivo</i> RMCE with MiMIC inserts on X and II   |
| yw, pC-(loxP2-attB2-SA(2)-T2A-Gal4-Hsp70); +; +                | Singlet Donor (phase 2) for <i>in vivo</i> RMCE with MiMIC inserts on II and III |
| yw; pC-(loxP2-attB2-SA(2)-T2A-Gal4-Hsp70); Dr/TM3,Sb           | Singlet Donor (phase 2) for <i>in vivo</i> RMCE with MiMIC inserts on X and III  |
| yw; Sp/Cyo; pC-(loxP2-attB2-SA(2)-T2A-Gal4-Hsp70)              | Singlet Donor (phase 2) for <i>in vivo</i> RMCE with MiMIC inserts on X and II   |
| yw, pC-(lox2-attB2-SA-T2A-Gal4-Hsp70) <sub>3</sub> ; +; +      | Triplet Donor for <i>in vivo</i> RMCE with MiMIC inserts on II and III           |
| yw; pC-(lox2-attB2-SA-T2A-Gal4-Hsp70) <sub>3</sub> ; Dr/TM3,Sb | Triplet Donor for <i>in vivo</i> RMCE with MiMIC inserts on X and II             |
| yw; Sp/Cyo; pC-(lox2-attB2-SA-T2A-Gal4-Hsp70) <sub>3</sub>     | Triplet Donor for <i>in vivo</i> RMCE with MiMIC inserts on X and II             |
| y, y <sup>+</sup> -hs-Cre, vas-dΦC31 <sup>1</sup>              | Dual recombinase line                                                            |

<sup>1</sup>The X-linked hs-Cre and vas-dΦC31 transgenes were recombined from individual stocks obtained from the Bloomington Stock Center (#34516 and #40161, respectively). The selection marker, 3XP3-RFP, originally associated with the vas- dΦC31 transgene was flanked by loxP sites and was excised upon recombination with hs-Cre.

## **Supplemental Experimental Procedures**

### **Molecular Biology**

Primers for PCR were synthesized by Integrated DNA Technologies, Inc. (Coralville, Iowa) and PCR amplification was performed with the 2X PCR Master Mix (Roche) or Phusion (NEB). All restriction enzymes and T4 DNA ligase were from New England Biolabs, Inc and plasmid mini-prep and midi-prep DNA was isolated using the High Pure Plasmid DNA Isolation Kit (Roche) or S.N.A.P. Plasmid DNA Midi Prep Kit (Invitrogen), respectively. All gene synthesis was carried out by Epoch Life Science, Inc (Sugar Land, TX) and DNA sequencing was performed by either the NINDS DNA Sequencing Facility or by Genewiz (Frederick, MD).

### **Trojan exon Constructs**

All Trojan exons except for the pT-GEM construct were made by modifying the three protein trap vectors introduced by Venken et al. for the three different reading frames: pBS-KS-attB1-2-PT-SA-SD-0, pBS-KS-attB1-2-PT-SA-SD-1 and pBS-KS-attB1-2-PT-SA-SD-2 (Drosophila Genomics Resource Center, clones # 1297, 1305 and 1313; Indiana University). To make the three Trojan Gal4 constructs with Hsp70 transcription termination signals (pBS-KS-attB2-SA(0/1/2)-T2A-Gal4-Hsp70), a T2A-Gal4-Hsp70 DNA fragment was PCR amplified from a pC-attB-burs $\alpha$ -mCD8-EGFP-T2A-Gal4 construct (Addgene #39463) (Diao and White, 2012; Venken et al., 2011) using primers with flanking *Bam*H I sites and the gel purified product was digested with *Bam*H I and ligated with each of the CIP-treated *Bam*H I-digested pBS-KS-attB1-2-PT-SA-SD vectors and then transformed into DH5 $\alpha$  *E. coli*. The Trojan Gal4 constructs lacking the Hsp70 terminator were made identically except that the T2A-Gal4 sequence was amplified without the Hsp70 terminator. Similarly, the Trojan Split Gal4 constructs, Gal4DBD, were made using the same strategy except that the T2A sequence (codon optimized for *Drosophila*

melanogaster) was integrated into the forward primers used to amplify Gal4DBD-Hsp70 and p65AD-Hsp70 fragments from the pBPZpGAL4DBDUw (Addgene #26233) vector (Pfeiffer et al., 2010), respectively. The Trojan dVP16AD constructs were made by first amplifying the dVP16AD sequence from a pCAST-CCAP-dVP16ADZip vector previously used to create pP{y+, dVP16AD} (Gao et al., 2008; Luan et al., 2006b) using a forward primer containing *BamH* I and dT2A sequences identical to those found in the Gal4 constructs and a reverse primer incorporating sequential *Avr* II, *Pac* I, and *Bgl* II restriction sites. This product was then cut with *BamH* I and *Bgl* II and subcloned into the *BamH* I cloning site of each protein trap vector to generate pBS-KS-attB2-SA(0/1/2)-T2A-dVP16AD vectors. Subsequently, the Hsp70 polyA terminator sequence was amplified from pBS-KS-attB2-SA-T2A-Gal4-Hsp70 using forward and reverse primers containing *Pac* I restriction sites and following *Pac* I digestion, this product was subcloned into the *Pac* I site of each pBS-KS-attB2-SA(0/1/2)-T2A-dVP16AD vector to generate pBS-KS-attB2-SA(0/1/2)-T2A-dVP16AD-Hsp70. These vectors are the most versatile of the Trojan vectors made and permit modular replacement of the dVP16AD transgene (using flanking *Apa* I and *Avr* II restriction sites) or the Hsp70 polyA terminator (using *Pac* I).

The Trojan p65AD constructs were made by first PCR amplifying p65AD fragment from pBPp65ADZpUw (Addgene # 26234) vector (Pfeiffer et al., 2010) with primer integrated with T2A sequence and then T2A-p65AD fragment was subcloned into Trojan dVP16AD constructs, which were removed dVP16AD by digestion with *BamH* I and *Avr* II.

The Trojan QF2 constructs were made by first PCR amplifying QF2 from pattb-nsyb-QF2-Hsp70 (Addgene #46115) (Riabinina, 2015) using in-Fusion (Clontech) compatible oligos (F-T2A-QF2: GAACCCCGGGCCCATGC CACCCAAGCGCAAAC; R-T2A-QF2: TTATTAATTAACCTAGGTCCTGTTTCGTATGTATTAATGTCGGAGAAG).

The PCR product was in-Fusion cloned into pBS-KS-attB1-2-SA (0/1/2)-T2A-VP16AD-Hsp70 that had been digested with *Nco I*/*Avr II* to remove the VP16AD insert. The Trojan LexA::QFAD constructs were made by first PCR amplifying LexA::QFAD from pattb-nsyb-Lex::QF-Hsp70 (Addgene #46123) (Riabinina, 2015) using in-Fusion (Clontech) compatible oligos (F-T2A-LexQF: GAACCCCGGGCCCATGC CACCCAAGAAGAAGCGAAAAGTAG; R-T2A-QF2: TTATTAATTAACCTAGGTCCTGTTTCGTATGTATTAATGTCTGGAGAAG).

The PCR product was in-Fusion cloned into pBS-KS-attB1-2-SA(0/1/2)-T2A-VP16AD-Hsp70 that had been digested with *Nco I*/*Avr II* to remove the VP16AD insert.

To make the Trojan 3XGal80 constructs, we first synthesized a T2A-Gal80<sup>FLAG/HA</sup>-P2A-Gal80<sup>EGFP</sup>-T2A-Gal80-Hsp70 sequence with flanking *BamH I* restriction sites using the P2A and T2A sequences described in Diao and White (Diao and White, 2012) and the drosophilized Gal80 sequence of Pfeiffer et al. (Pfeiffer et al., 2010). This construct was then subcloned into the *BamH I* site of each of the three protein trap vectors of Venken et al. (Venken et al., 2011) to produce the three pBS-KS-attB2- SA(0/1/2)-T2A-3X Gal80<sup>FLAG/HA/EGFP</sup>-Hsp70 vectors. In each, the first Gal80 sequence is followed by sequences encoding FLAG and HA tags, which result in C-terminal fusions for immuno-detection. The second Gal80 gene is fused to the EGFP sequence.

### **pT-GEM constructs**

To make the pT-GEM vectors, an initial backbone construct (i.e. pBS-KS-attP2-loxP2-3XP3-RFP) was synthesized and cloned into pBS at the *EcoR V* site. This construct included multi-cloning sites at the 5' (*Age I*, *Sph I*, and *Not I*) and 3' (*Asc I*, *Kpn I*, and *Spe I*) ends for insertion of homology arms; nested (and inverted) attP sites; a floxed 3XP3-RFP sequence consisting of three copies of a Pax3 promoter sequence followed by the coding sequence of Red Fluorescent

Protein (Bischof et al., 2007) to serve as a selection marker following transformation, and the portion of the Hsp70 polyA transcription terminator sequence 3' of an endogenous *Nco* I restriction site. The sequence just prior to the *Nco* I site included the 5' attP site and the linker found between the attB site and the splice acceptor in the protein trap constructs of Venken et al. (Venken et al., 2011). This sequence included the *Xba* I site just prior to the splice acceptor site. To complete the three pT-GEM vectors, a SA(0/1/2)-T2A-Gal4-Hsp70 restriction fragment was excised from each of the three pBS-KS-attB2-SA(0/1/2)-T2A-Gal4-Hsp70 vectors by digestion with *Xba* I and *Nco* I and ligated into pBS-KS-attP2-loxP2-3XP3-RFP after double digestion with the same enzymes.

Each of the homology arms of the construct used for pT-GEM insertion into the *pburs* locus consisted of approximately 1 kb of sequence amplified by PCR from genomic DNA of the {nos-Cas9} attP2 line used for embryo microinjection (Ren et al., 2013). The sequences of the PCR primers used for homology arm amplification were:

For-HA<sub>L</sub>: AGTCAG ACCGGT TCGTCGATGATTCTAAAGC

Rev-HA<sub>L</sub>: AGTCAG GCGGCCGC TAGAGGCAGGATTCAAACCTT

For-HA<sub>R</sub>: AGTCAG ACTAGT ATGTTTTCGAGACGAGTTTC

Rev-HA<sub>R</sub>: AGTCAG GGCGCGCC TAGAGTTAGCGAACTCTAAG

The guide RNA expression construct (sgRNA) was made by inserting the annealing product of two oligos (ttcgAGAGTTCGCTAACTCTATAG and aaacCTATAGAGTTAGCGAACTCT ) into the U6b-sgRNA-short plasmid of (Ren et al., 2013) after digestion with *Bbs* I (New England Biolabs).

**Triplet donor constructs, pC-(lox2-attB2-SA-T2A-Gal4-Hsp70)3**

The triplet donor construct, was assembled from several synthesized gene fragments. First, a basic backbone consisting of one of each of the three uniquely floxed attB2-SA-Hsp70 sequences was synthesized with the following features: The attB2-SA sequences used to establish the three different reading frames (i.e. phases) of each donor were identical to the corresponding sequences of the protein-trap vectors developed by Venken et al. (Venken et al., 2011). Following attB2-SA sequence, there is a unique triplet of restriction sites: *Age* I/*Sph* I/*Not* I for Phase 0, *Spe* I/*Mlu* I/*Fse* I for Phase 1, and *EcoR* I/*Bsiw* I/*Asc* I for Phase 2. The sequences of the loxP, loxN and lox2272 sites recognized by Cre recombinase were identical to those used by Livet et al. (Livet et al., 2007), including the 20 bp spacer sequences separating neighboring lox sites. The unique 100 bp spacer sequences separating each pair of lox and attB sites were derived from a 600 bp sequence located in the promoter of *nerfin1* and shown to lack any DNA regulatory elements (Kuzin et al., 2009). The backbone construct was cloned into pBS to form pBS-(lox2-attB2-SA-Hsp70)<sub>3</sub> with *Xho* I and *Bam*H I restriction sites flanking the insertion and then subcloned into the pCAST vector (Luan et al., 2006b) using *Xho* I and *Bam*H I to generate the pC-(lox2-attB2-SA-Hsp70)<sub>3</sub> vector. Also synthesized were genes encoding the three phases of T2A-Gal4 with the following flanking restriction sites: Phase 0 construct: *Age* I and *Sph* I (5'), *Not* I (3'); Phase 1 construct: *Spe* I and *Mlu* I (5'), *Fse* I (3'); Phase 2 construct: *EcoR* I and *Bsiw* I (5'), *Asc* I (3'). Paired combinations of 5' and 3' restriction sites were then used to subclone the three T2A-Gal4 DNA fragments into the complementary sites of the pC-(lox2-attB2-SA-Hsp70)<sub>3</sub> vector to make the final donor construct vector, pC-(lox2-attB2-SA-T2A-Gal4-Hsp70)<sub>3</sub>.

**Singlet donor constructs, pC-(loxP2-attB2-SA-T2A-Gal4-Hsp70)**

Singlet donor constructs were made similarly to the triplet donor constructs. First, backbone fragments consisting of loxP flanked attB2-SA sequences were synthesized in all three phases using the attB2-SA sequences described by Venken et al. (2011) and the 100 bp spacer sequence separating the loxP and attB sites used in triplet donor. These backbone fragments were first cloned into pBS using *Xho* I and *Bgl* II restriction sites and then subcloned into the pCAST vector (Luan et al., 2006b) using *Xho* I and *Bam*H I to make the pC-(loxP2-attB2-SA) vectors. A T2A-Gal4-Hsp70 fragment derived from the Trojan T2A-Gal4-Hsp70 construct by *Bam*H I digestion was then cloned into the pC-(loxP2-attB2-SA) vectors to make the pC-(loxP2-attB2-SA-T2A-Gal4-Hsp70) singlet donor constructs.

#### **TubP-dVP16AD, TubP-Gal4DBD, and ETH-Gal4 constructs**

To permit screening of Trojan Split Gal4 recombinants by fluorescence we made fly lines that carry ubiquitously expressed dVP16AD or Gal4DBD constructs expressed behind the tubulin-1 $\alpha$  promoter (TubP). To make these constructs, the pCaSpeR4-tubP-Gal80 vector (gift of Tzumin Lee) was double digested with *Not* I and *Xba* I to excise Gal80, which was replaced by either dVP16ADZip (obtained from pCAST-CCAP-dVP16ADZip by digestion with *Not* I and *Xba* I) or ZipGal4DBDflUw (amplified from pBPZpGal4DBDUw by PCR using primers carrying flanking *Not* I or *Xba* I restriction sites) (Pfeiffer et al., 2010). The resulting pCaSpeR4-TubP-dVP16AD and pCaSpeR4-TubP-Gal4DBD constructs were used to make transgenic fly lines. The ETH-Gal4 construct was made by cloning into the pPTGAL vector (Sharma et al., 2002), a 397 bp promoter fragment starting just upstream of the start methionine codon of the Ecdysis Triggering Hormone gene. This fragment includes a 382 bp sequence known to promote selective expression in the Inka cells (Park et al., 2002) and was amplified from a BAC clone from the RPCI-98 *Drosophila melanogaster* BAC Library

(<http://bacpac.chori.org/dromel98.htm>) using the following PCR primers:

TAGCAGCAGATCAGAAATACTTTGTA (Forward);

GCTGATGCGACTGAAGCTTCACCTGA (Reverse) and the High Fidelity Expand Long Template PCR system (Roche).

### **Fly lines**

MiMIC lines were obtained from either the Bloomington Stock Center at Indiana University or the Bellen Lab of Baylor College of Medicine. The TubP-dVP16AD, TubP-Gal4DBD, and ETH-Gal4 lines were made by P-element transformation and insertions of TubP-dVP16AD and TubP-Gal4DBD on chromosomes X, II, and III were isolated and characterized. An ETH-Gal4 insertion on chromosome II was used in the experiments described here. The following lines were described previously: w;<sup>+</sup>;Burs-Gal4DBD(Luan et al., 2012), and w;Sp/CyO;CCAP-Gal4DBD and yw;elav-Gal4DBD;Dr/TM3,Sb(Luan et al., 2006b). w;<sup>+</sup>;Rdl<sup>2-1</sup>-Gal4 and w;Rdl<sup>2-2</sup>-Gal4/CyO;<sup>+</sup> were gifts from Dr. Julie Simpson at JFRC, HMHI. All other stocks, including: yw, M{vas-int.B}ZH-2A; Sb/TM6B, Tb; yw, UAS-2XEYFP; Dr/TM3,Sb; w;<sup>+</sup>;UAS-2X EGFP, w;10XUAS-IVS-myr::GFP (attP40);<sup>+</sup>, w; <sup>+</sup>;10XUAS-IVS-myr::GFP (attP2), w;13XLexAop2-IVS-myr::GFP (VK00005), w;13XLexAop2-IVS-myr-tdTomato (su(Hw)attP5);<sup>+</sup>, w;<sup>+</sup>;20xQUAS-mCD8:GFP/TM6B, w;UAS-nlsGFP;<sup>+</sup> ; w;<sup>+</sup>;nucLacZ, w;UAS-CD4-tdTomato were obtained (or derived from stocks) from the Bloomington Drosophila Stock Center at Indiana University. All plasmid injections to generate Trojan-MiMIC lines were performed by Rainbow Transgenic Flies, Inc. or BestGene, Inc. A complete list of transgenic fly lines developed for use in implementing the Trojan system are shown in Table S1.

### **Lines made by ΦC31-mediated conversion of MiMIC lines by plasmid injection**



Midiprep plasmid DNA containing the desired Trojan exon in the correct reading frame was injected either together with  $\Phi$ C31 plasmid DNA into the embryos of flies bearing MiMIC insertions into genes of interest or into the embryos of flies bearing both the MiMIC insertion and an X-linked transgene expressing  $\Phi$ C31. Following  $\Phi$ C31-mediated cassette exchange and isolation of recombinant animals, PCR amplification of the 5' and 3' ends of the insertion site was performed to confirm correct insertion. Amplification at each end was accomplished using a primer complementary to the flanking genomic sequence 1.2-1.5 kb from the MiMIC insertion and an internal primer complementary to either the T2A sequence (T2A-anti: CGCCGCAGGTCAGCAGG) or a region within the Hsp70 PolyA terminator (Hsp70\_sense: TTATTCAGTTCCTGGCTTAAGTT). PCR products were evaluated for correct size and in some cases were sequenced to confirm the phases of the inserted Trojan exon. Recombinant transformants were isolated as described in Figure S1, using UAS-2XEYFP, UAS-2XEGFP, 13XLexAop2-myr-tdTomato, and QUAS-mCD8-GFP as the fluorescent expression markers. In some cases, developmental lethality was observed that appeared to derive from high levels of fluorescence protein expression (particularly EYFP) and a second strategy was used to isolate recombinants based on the loss of the  $y^+$  selection marker associated with the MiMIC insertion. In this strategy, G0 flies from plasmid injected embryos were crossed with flies from the  $yw;Sp/CyO;Dr/TM3,Sb$  double balancer line and  $y^-$  recombinant progeny were isolated. The orientation of the Trojan exon insert was then determined by PCR amplification of the insertion and confirmed by its ability to drive the expression of a fluorescent reporter. This second strategy was also used to screen for MiMIC-T2A-3XGal80<sup>FLAG/HA/EGFP</sup>-Hsp70 recombinants and expression of 3XGal80<sup>FLAG/HA/EGFP</sup> in these flies was confirmed by immunostaining with anti-

EGFP antibody (Invitrogen). In general, the endogenous fluorescence of the EGFP-tagged Gal80 moiety was too weak to detect in live animals.

### **Lines made *in vivo* using the triplet donor line**

Flies bearing inserts of the triplet donor transgene were made by P-element mediated transformation using pC-(lox2-attB2- SA-T2A-Gal4-Hsp70)<sub>3</sub>. Lines were established with insertions of the triplet donor on chromosomes X, II, and III. The transgenic line with the 2<sup>nd</sup> chromosome insert, “Triplet-10,” was used as the Trojan Gal4 donor to make the Trojan-MiMIC Gal4 lines described here. The procedure is as described in Figure S1 and uses a dual-recombinase line with X-chromosome inserts of both the Cre recombinase (Siegal and Hartl, 1996) (i.e. Bloomington stock #766) and vas-dΦC31 (Bischof et al., 2007) (Bloomington stock #40161). Due to the high activity of Cre, all crosses can be raised at 25°C.

### **Pburs<sup>TGEM</sup>-Gal4 line made using pT-GEM**

The Pburs<sup>TGEM</sup>-Gal4 transgenic flies were made by microinjection into embryos of {nos-Cas9} attP2 flies, which express the Cas9 nuclease in germline cells under the control of the nanos promoter (Ren et al., 2013). Embryos were co-injected with sgRNA and pT-GEM plasmid DNA, and adults were crossed to flies from the yw,UAS-2XEYFP; Sp/CyO; Dr/TM3,Sb reporter-balancer line to isolate transformed larvae that expressed the UAS-2XEYFP reporter and, as adults, the eye-specific marker, Red Fluorescent Protein. These animals were crossed back to flies of the reporter-balancer line to create stable stocks.

### **Immunostaining, Fluorescence *In Situ* Hybridization, and Confocal Microscopy**

Fixation, staining, and confocal imaging of wholemount CNS preparations from third instar larvae or adults were carried out according to previously published procedures (Peabody et al.,

2008). Rabbit anti-vGlut (gift of Dr. Aaron DiAntonio of Washington University in St. Louis) was used at 1:5000 dilution. Guinea pig anti-Eve (Kosman et al., 1998) (gift of John Reinitz) was used 1:500; mouse anti-Pburs (gift of Aaron Hsueh) was used at 1:100, rabbit anti-Burs $\alpha$  and, rabbit anti-CCAP (Luan et al., 2006a) were used at 1:5000 dilution. Mouse anti-LacZ (Promega) and mouse anti-EGFP (Invitrogen) were used at 1:100 dilution. Secondary antibodies labeled with AlexaFluor 488, 568, and 647 (Invitrogen) were used. Fluorescent *in situ* hybridizations were carried out on embryos fixed with 4% paraformaldehyde. Embryos were equilibrated in hybridization buffer (50% RNase free formamide, 1X Denhardt's (RNase free), 500  $\mu$ g/ml salmon sperm ssDNA (boiled), 250  $\mu$ g/ml tRNA (boiled), 50  $\mu$ g/ml heparin, 4X SSC, 0.1% Tween-20, 5% Dextran sulfate in H<sub>2</sub>O) for 1 hr at 52°C before overnight incubation with vChaT riboprobe. The vChaT gene is co-expressed from the same genomic locus as Cha (Kitamoto et al., 1998), and T7 RNA polymerase (New England Biolabs) was used to generate the riboprobe from a 649 bp fragment of vChaT coding sequence amplified by PCR using specific 5' (TTTCTGGAGCCAACCATTTTC) and 3' (CAGCAGTATCAGCAGGAGC) primers with a T7 promoter sequence overhang. Hybridized embryos were washed in Washing Buffer (50% RNase free formamide, 2X SSC, 0.1% Tween-20 in H<sub>2</sub>O) before blocking (20% Western blocking reagent (Roche) in phosphate buffered saline plus 0.3% Tween-20) for 1 hr at room temperature and incubated overnight with sheep anti-DIG-POD (1:100, Roche) and mouse anti-GFP (1:200, Sigma) at 4°C. Hybridized riboprobe was then visualized by tyramide amplification (1:50 Tyramide System Amplification System, Perkin Elmer) and anti-GFP using goat anti-mouse AlexaFluor 488 (1:300, Invitrogen). Fluorescent imaging of larval and adult CNS preparations were performed with a Nikon C-1 confocal microscope. Z-series through either the brain or ventral nerve cord of each sample were acquired in 1 $\mu$ m increments using a 20X objective. The

presented images are composites of separately acquired volume-rendered images of the brain and ventral nerve cords. Imaging of late embryonic and early larval ventral nerve cords used a Leica TCS SP5 confocal microscope (x63/ 1.40 N.A. oil immersion objective) and images were acquired with a voxel size of 1.52 x 1.52 x 0.59  $\mu\text{m}$ .

**DNA Sequences:** Restriction enzyme sites or multiple cloning sites are underlined. Coding sequences are in green; Hsp70 transcription terminator sequences are in red; *lox* sequences are italicized.

### Trojan Exon Sequences

attP2-T2A-Gal4-Hsp70-loxP2-3XP3-RFP of pT-GEM (phase 0)

accggtgcatgcgcggccgccccaggtcagaagcggttttcgggagtagtccccaaactgggtaacctttgagttctctcagttgggggc  
gtagggctgccgacatgacacaaggggtttctagaagtcgatccaacatggcgactgtcccatccccggcatgtttaaatafactaattattc  
ttgaactaatttaatacaaccgatttatctctctccgcaggtgggaggttccgggtggaagcggaggtagcggcgatccgagggccgcggc  
agcctgctgacctgcggcgatgtggaggagaacccccgggccatgaagctgctgagcagcatcagcaggcctgcgatatctgccgct  
gaagaagctgaagtgcagcaaggagaagccccagtgcccaagtgctgaagaacaactgggagtgccgctacagccccaaagaccaa  
gcgagccccctgacctgcgccacctgaccgaggtggagagccgctggagcgcctggagcagctgttctgctgatcttccccgcg  
aggatctggatatgatctgaagatggatagcctgcaggatatcaaggcctgctgaccggcctgttcgtgcaggataactgaacaagga  
tgccgtgaccgatgcctggccagcgtggagaccgatatgccctgacctgcgccagcaccgcatcagcgcaccaccagcagcagcag  
gagagcagaacaagggccagcgcaccagctgaccgtgagcatcgatagcgcgccaccacgataacagcaccatccccctggattcat  
gccccgcgatgcctgcacggcttcgattggagcaggaggatgatagcgcgatggcctgcccttctgaagaccgatcccaacaaca  
cgcttcttcggcgatggcagcctgctgtgcatcctgcgcagcatcgcttcaagcccgagaactacaccaacagcaactgaaccgct  
gcccaccatgatcaccgatcgtacaccctggccagccgagcaccaccagccgctgctgcagagctacctgaacaacttccacccta  
ctgccccatcgtgcacagccccaccctgatgatgctgtacaacaaccagatcagatcgcagcaaggatcagtgccagatcctgttcaac  
tgcactctggccatcggcgctggtgcatcagggcgagagcaccgatcgcgatgttctactaccagaacgccaagagccacctgacc  
agcaaggtgttcgagagcggcagcatcctggtgaccgcctgcacctgctgagccgctacaccagtgccgccaagaagaccaaac  
cagctacaacttccacagctcagcatccgcatggccatcagcctgggctgaaccgcgatctgccagcagcttcagcagatcagcagc  
ctggagcagcgcggccatctggtggagcgtgtacagctgggagatccagctgagcctgctgtacggccgagcatccagctgagcca  
gaacaccatcagcttccccagcagcgtggatgatgtgcagcgcaccaccaccggccccaccatctaccacggcatcagagaccgccc  
gcctgctgcaggtgttccaagaatctacagctggataagaccgtgaccgccgagaagagccccatctgcgccaagaagtgcctgatga  
tctgcaacgagatcaggaggtgagccgcccagccccaaagtctgcagatggatatcagcaccaccgcccctgaccaacctgctgaag  
gagcaccctggctgagcttaccgcttcgagctgaagtggaagcagctgagcctgatcctacgtgctgcgcgatttcttccaacttc  
accagaagaagagccagctggagcaggatcagaacgatcaccagagctacgaggtgaagcgtgcagcatcagctgagcagatgccg  
cccagcgcaccgtgatgagcgtgagcagctacatggataaccacaacgtgaccccctacttgcctggaactgcagctactacctgttcaa  
cgccgtgctggtgccatcaagacctgctgagcaacagcaagcaacgccgagaacaacgagaccgcccagctgctgcagcagatc  
aacaccgtgctgatgctgctgaagaagctggccacctcaagatccagacctgcgagaagtacatccaggtgctggaggaggtgtgcgc  
cccttctgctgagccagtgcccatccccctgccccacatcagctacaacaacagcaacggcagcgcctcaagaacatcgtgggcag  
cgccaccatcggccagtaaccaccctgcccaggagaacgtgaacaacatcagcgtgaagtacgtgagccccggcagcgtgggacc  
agccccgtgcccctgaagagcggcgccagcttcagcagatctggtgaagctgctgagcaaccgccccccagccgcaacagccccgtga  
ccatccccgcagcaccaccagcaccgcagcgtgaccccccttctgggcccagcagcagcagctgcagagcctggtgcccctgacccc  
cagcgcctgttcggcgccgccaactcaaccagagcggcaacatcgccgatagcagcctgagcttacccttccaacagcagcaacg  
gccccaaactgatcaccaccagaccaacagccagggcctgagccagcccacgcccagcagcaactgcaagataacttcatgaacaac

gagatcaccgccagcaagatcgatgatggcaacaacagcaagcccctgagccccggctggaccgatcagaccgctacaacgccttcg  
gcatcaccaccggcatgttcaaccaccaccatggatgatgtgtacaactacctgttcgatgatgaggataccccccaacccaagaa  
ggagtaaatgaatcgtagactgaaaaacccgcaagttcacttcaactgtgcatcgtgcaccatcgaattttttcattatacatcgtttg  
ccttctttatgtaactatactccttaagtttcaatcttggccatgtaacctctgatctatagaatttttaaatgactagaattaatgcccatctttttt  
tggacctaaattctcatgaaaaatattacgagggcttattcagaagcttaccgataaccgtcactaaagccaaatagaaattattcagttctgg  
cttaagtttttaaaagtgatatttttttggttgtaaccaacaaaagaatgtaataactaatacataaattatgttagtttaagtagcaacaaat  
tgattttagctatattagctacttggtaataatagaatatttttaagataaattcgtttttattgacaggagtgagtttgcttaaaaactcgtt  
ggatccgacgtcataacttcgtatagcatacattatacgaagttatcctaggggatcattcaattagagactaattcaattagagtaattca  
attagatccaagcttatcgatttgaaccctcgaccgccggagataaatagaggcgcttcgtctacggagcgacaattcaattcaacaag  
caaagtgaacacgctcgaagcgaagtaagcaataaacaagcgcagctgaacaagctaaacaatcggactagagccggtcgccacc  
atgaggtctccaagaatgtatcaaggagttcatgaggttaaggttcgcataggaaggaacgggtcaattgggcacgagtttgaatagaagg  
cgaaggagaggggagggccatacgaaggccacaataaccgtaaagcttaagtaaccaagggggaccttggcatttgctgggatatttg  
tcaccacaatttcagtatggaagcaaggtatgtcaagcaccctgccgacataaccagactataaaaagctgtcatttctgaaggattaaat  
gggaaagggctcatgaacttgaagacgggtggcgtcgttactgtaaccaggattccagtttgcaggatggctgttcatctacaaggtaagtt  
cattggcgtgaacttcttccgatggacctgttatgcaaaaagaagacaatgggctgggaagccagcactgagcgtttgtatcctcgtgatgg  
cgtgttgaaggagagattcataaggctctgaagctgaaagacgggtggtcattacctagttagttcaaaagtattacatggcaagaagcc  
tgtgcagctaccagggtactactatgttactcctgatacaaacgcaacgaagactatacaatcgttgagcagtatgaaagaa  
ccgagggacgccaccatctgttcttttaggatctttgtaaggaacctactctgtggtgtgacataaattggacaaactacctacagagattta  
aagctctaaggtaaatataaaattttaagtgtataatgtgttaaaactactgattctaattgtttgtatttttagattccaacctatggaactgatgaa  
tgggagcagtggtggaatgcctttaatgaggaaaacctgtttgctcagaagaaatgccatctagtgtatgatgaggtactgctactctcaa  
catttactcctccaaaaagaagagaaaggtagaagaccccaaggacttctcagaattgctaagtttttgatcatgctgttttagtaat  
agaactcttgcttgctttgctatttacaccacaaaggaaaaagctgcactgctatacaagaaaattatggaaaaatattgatgtatagtccttg  
actagagatcataatcagccataccacattttagaggtttacttgttttaaaaacctcccacacctcccctgaacctgaacataaaatga  
atgcaattgttgtttaaactgtttattgcagcttataatggttacaataaagcaatagcatcacaatttcacaataaagcattttttcactgca  
ttctagttgtggtttgccaactcatcaatgtatcttatcatgtctggatcgcgtagcataacttcgtatagcatacattatacgaagttatctcga  
gaaccttgtgtcatgtcggcgaccctacgcccccaactgagagaactcaaaggttaccacagttggggcactactcccgaaccgctt  
ctgacctggggggcgcgccgtaccactagt

Note that the three phases of pT-GEM differ in the short linker sequences between the splice acceptor and T2A sequences. These linker sequences are as follows:

Linker of Phase 0: agGTGGGAGGTTCCGGTGGAAAGCGGAGGTAGCGGCGGATCC

Linker of Phase 1: agGTGGCGGAGGTTCCGGTGGAAAGCGGAGGTAGCGGCGGATCC

Linker of Phase 2: agGTCGGGAGGTTCCGGTGGAAAGCGGAGGTAGCGGCGGATCC

T2A-Gal4-Hsp70 Insertion Sequence

ggatccgagggcgcggcagcctgctgacctgcggcgatgtggaggagaacccgggccatgaagctgctgagcagcatcagagcag  
gctgcgatctcggcctgaagaagctgaagtgcagcaaggaagcccaagtgcgcaagtgcctgaagaacaactgggagtgcc  
gctacagcccaagaccaagcgcagccccctgaccgcgccacctgaccgaggtggagagccgctggagcgcctggagcagctgt  
tctgctgatcttccccgcgaggatctggatgatcctgaagatggatagcctgcaggatatcaaggcctgctgaccggcctgttcgtgc  
aggataacgtgaacaaggatgccgtgaccgatcgcctggccagcgtggagaccgatagccctgacctgcgccagcaccgcatcagc  
gccaccagcagcagcaggagagcagcaacaaggccagcgcagctgaccgtgagcatcgaatagcgcgccaccacgataacag  
caccatccccctggatttcatgccccgcgatgcctgcacggcttcgattggagcaggaggatgatagagcagtgccctgccttctga  
agaccgatccaacaacaacggcttctcggcgatggcagcctgctgtgcatcctgcgcagcaccgcttcaagcccgagaactaccca  
acagcaacgtgaaccgctgccaccatgatcaccgatcctacacctggccagccgcagcaccaccagccgctgctgcagagctac  
ctgaacaacttccacctactgccccatcgtgcacagccccacctgatgatgctgtacaacaaccagatcgagatcgccagcaaggatc  
agtggcagatcctgttcaactgcatcctggccatcggcgctggtgcatcgaggggcagagaccgatcagatgtgttactaccagaac

gccaaagaccacctgaccagcaaggtgttcgagagcggcagcatcatcctggtgaccgcctgcacctgctgagccgctacaccagtgcgccagaagaccaaccagctacaactccacagcttcagcatccgcatggccatcagcctgggctgaaccgcgatctgccagcagcttcagcagcatcctggagcagcgcgccgcatctggtggagcgtgtacagctgggagatccagctgagcctgctgtacggcgcgagcatccagctgagccagaacacatcagcttccccagcagcgtggatgatgtgcagcgcaccaccaccggccccacatctacca cggcatcatcagaccgcccgcctgctgcaggtgttccaagatctacgagctggataagaccgtgaccgccgagaagagccccatctgcgccaagaagtgcctgatgatctgcaacgagatcagaggaggtgagccgccaggcccccaagttcctgcagatggatatcagcaccaccgccctgaccaacctgctgaaggagcaccctggctgagcttaccgcttcgagctgaagtggaagcagctgagcctgatcatctacgtgtgcgctgattcttccaacttaccagagaagaagagccagctggagcaggatcagaacgatcaccagagctacgaggtgaagcgtgca gcatcatgctgagcagatgccgccagcgcaccgtgatgagcgtgagcagctacatggataaccacaacgtgaccocctacttcgctgga actgcagctactactgttcaacgccgtgctggtgccatcaagacctgctgagcaacagcaagagcaacgccgagaacaacgagacc gcccagctgctgcagcagatcaaacctgctgatgctgctgaagaagctggccacctcaagatccagacctgcgagaagtacatccag gtgctggaggaggtgtgcgccccctcctgctgagccagtgcgccatccccctgccccacatcagctacaacaacagcaacggcagcgc catcaagaacatcgtgggcagcgcaccatcgcaccgtacccccacctgcccaggagaacgtgaacaacatcagcgtgaagtacgtga gccccggcagcgtgggaccagccccgtgccctgaagagcggcgcagcttcagcagatctggtgaagctgctgagcaaccgcccc cagccgcaacagccccgtgacctccccgcagcaccaccagccaccgcagcgtgacccccctcctgggccagcagcagcagctgca gagcctggtgccctgacccccagcgcctgttcggcggcgccaactcaaccagagcggcaacatcggcgatagcagcctgagcttca ccttccaacagcagcaacggccccacctgatcaccaccagaccaacagccagccctgagccagccccatcggcagcagcaactgcacgataacttcatgaacaacgagatcaccgccagcaagatcagatgatggcaacaacagcaagccccctgagccccggctggaccgatc agaccgctacaacgccttcggcatcaccaccggcatgttcaaccaccaccatggatgatgtgtacaactacctgttcgatgatgaggat acccccccaacccaagaaggagtaataaatgaatcgtagatactgaaaaacccgcaagttcacttcaactgtgcatcgtgcaccatc caatttcttctattatacatcgttttgccttctttatgtaactatactccttaagtttcaacttggccatgtaacctctgatctatagaatttttaaat gactagaattaatgcccatcttttttggacctaaattcttcatgaaaatatactacagggcttattcagaagcttaccgataccgtcactaaag ccaaatagaaattattcagttctggttaagttttaaaagtgtatattttttggttgaaccaacaaaagaatgtaataactaatacataatt atgttagtttaagttagcaacaaattgattttagctatattagctacttggtaataataagaatataatttttaagataatcgtttttattgacgg agtgagtttgcttaaaaactcgttggatcc

T2A-Gal4 Insertion Sequence (without Hsp70 transcription terminator)

ggatccgagggccgcggcagcctgctgacctcggcgatgtggaggagaacccgggccatgaagctgctgagcagcatcagcagc gctgcgatatctccgctgaagaagctgaagtgcagcaaggagaagcccaagtgcccaagtgctgaagaacaactgggagtgcc gctacagcccaagaccaagcgcagccccctgaccgcgccacctgaccgaggtggagagccgctggagcgcctggagcagctgt tctgctgatcttccccgcgaggatctggatatgatcctgaagatggatagcctgcaggatatcaaggccctgctgaccggcctgttcgtgc aggataacgtgaacaaggatgccgtgaccgatcgcctggccagcgtggagaccgatatgccctgacctgcgccagcaccgcatcagc gccaccagcagcagcaggagagcagcaacaaggccagcgcagctgaccgtgagcagcagatagcgcgccaccacgataacag caccatccccctggatttcatgccccgcgatgcctgcacggcttcgattggagcagggagatgatatgagcagtgccctgccccctcctga agaccgatcccaacaacaacggcttcttcggcagatggcagcctgctgtgcatcctgcgcagcagcagcttcaagcccgagaactaccca acagcaacgtgaaccgctgcccaccatgatcaccgatcgtacacctggccagccgcagcaccaccagccgctgctgcagagctac ctgaacaacttccccctactgccccatcgtgcacagccccacctgatgatgctgtacaacaaccagatcagatcggcagcaaggatc agtggcagatcctgttcaactgcatcctggccatcggcgcctggtgcatcagggcgagagcaccgatatcagatgttctactaccagaac gccaagagccacctgaccagcaaggtgttcgagagcggcagcatcatcctggtgaccgcctgcacctgctgagccgctacaccagtgcgccagaagaccaaccagctacaactccacagcttcagcatccgcatggccatcagcctgggctgaaccgcgatctgccagca gcttcagcagatagcagcagcctggagcagcgcgccgcatctggtggagcgtgtacagctgggagatccagctgagcctgctgtacggc cgcagcatccagctgagccagaacacatcagcttccccagcagcgtggatgatgtgcagcgcaccaccaccggccccacatctacca cggcatcatcagaccgcccgcctgctgcaggtgttccaagatctacgagctggataagaccgtgaccgccgagaagagccccatct gcgccaagaagtgcctgatgatctgcaacgagatcagaggaggtgagccgccaggcccccaagttcctgcagatggatatcagcaccacc gccctgaccaacctgctgaaggagcaccctggctgagcttaccgcttcgagctgaagtggaagcagctgagcctgatcatctacgtgc tgcgctgattcttccaacttaccagagaagaagagccagctggagcaggatcagaacgatcaccagagctacgaggtgaagcgtgca

gcatcatgctgagc gatgccgccagcgcaccgtgatgagcgtgagcagctacatggataaccacaacgtgacccccctacttcgcttga  
actgcagctactacctgttcaacgccgtgctggtgccatcaagaccctgctgagcaacagcaagcaacgccgagaacaacgagacc  
gccagctgctgcagcagatcaacaccgtgctgatgctgctgaagaagctggccacctcaagatccagacctgcgagaagtacatccag  
gtgctggaggaggtgtgcgccccctctgctgagccagtgcgccatccccctgccccatcagctacaacaacagcaacggcagcgc  
catcaagaacatcgtgggcagcgcaccatcgcaccgtacccccacctgcccaggagaacgtgaacaacatcagcgtgaagtacgtga  
gccccggcagcgtgggaccagccccgtgccctgaagagcggcgccagctcagc gatctggtgaagctgctgagcaaccgcccc  
cagccgaacagccccgtgacctccccgcagcaccgccaccgcagcgtgacccccctctgggccagcagcagcagctgca  
gagcctggtgccctgacccccagcgcctgttcggcgcccaactcaaccagagcggcaacatcggcatagcagcctgagcttca  
cctcaccacagcagcaacggccccaacctgatcaccaccagaccaacagccagccctgagccagccccatcggcagcagcaacgt  
gcagataactcatgaacaacgagatcaccgccagcaagatc gatgatggcaacaacagcaagccccctgagccccggctggaccgatc  
agaccgctacaacgccttcggcatcaccaccggcatgttcaaccaccaccatggatgatgtgtacaactacctgttcgatgatgaggt  
accccccaacccaagaaggatcc

T2A-QF2-Hsp70 Insertion Sequence

ggatccgagggccgcggcagcctgctgacctgcggcgatgtggaggagaacccgggccatgccaccaagcgaacgcttaac  
gctgcggctgaggtaacgctcatgccgacggacacgccgacggaaacgccgacggacacgtggccaatacggccgctcctcgaata  
atgcgaggttcgctgatctactaacatc gatactccgggtctgggaccacaactacgacctgctcgtggaaccagcagcgtcaaagc  
tcaacgagtgctccgcgatcgcaccagtgccgtgcagcccagagaaaatgcgacggaatacagcctgctgttcccgtcgtttccca  
gggaaggtcctgacttatcaggcttcgccgaaaaagaggggagttcaaacgggtatattcgtacgctggagctcgcctcgcctggatgt  
ttgaaaatgctgcgctccgaagatgcctgcataacctctcgtccgtgacggcagcaaggatcagctctgctcgttggtaaagattcgc  
cggctgccgagcactccatgccgtgggctactagccgtgtcaataagagcattaccgctcctccgtcagttggagctcctcctacc  
gccacggctacggctcgataatgccgcacgtgatggagcagcctctcagtaccagcattaacccgcaacgaccgttcaacggattc  
ccaacccactccgataactccgatgcagctctc gatgctatcactcagaccaacgattatggaagcgtaaatacatatggtatcctctac  
ttaccgcccaggtacgcacctaatgaagcttcgctcgtcctccgggtggcgccccccccgaccgctcctccgatgttgaca  
gcagaccaatcaccgccgtaccactcgaatctggtccaatggcgaactttggttactcagcgttgattacgatccatggtgacgatt  
ggctagcattgaatacagcagcgtctggatgctgaccacagttatgaccaatctgggattcgtcctggatgtaacttctccgacattaata  
catacgaacagtgactagtttaataaaatgaatcgtagatacgtgaaaacccgcaagttcacttcaactgtgcatcgtgcaccatctc  
aatttcttcttatacatcgttttgcctctttatgtaactatactccttaagttcaacttggccatgtaacctctgatctatagaatttttaaatg  
actagaattaatgcccacttttttggacctaaattcttcatgaaaatatattacgagggcttattcagaagcttaccgataccgtcgaactaaagc  
caaatagaaattatcagttctgcttaagttttaaagtataattttttggttgaaccaacaaaagaatgtaataactaatacataattat  
gttagtttaagtagcaaaaattgatttagctatattagctacttggtaataaataagaataatttttaagataatcgtttttattgtaggga  
tgagtttgcctaaaaactcgtt ttaattaa

T2A-LexA::QFAD-Hsp70 Insertion Sequence

ggatccgagggccgcggcagcctgctgacctgcggcgatgtggaggagaacccgggccatgccaccaagaagaagcgaacgcttaac  
agaagatccaatgaaggctctcagggccgacaacaggaagttttgatttgatacgggatcatatatccaaacgggtatgctcaccgacc  
gcgagagatagcacagcagctgggcttctgacgcctaacgccgaggagcacttgaaggcactggcccgaagggtgctcattgaa  
atcgtgtccgggtgcgagccgcggaatccggctgttgcaggaggaggaagagggcctgccactggtgggacgcgtggccgctggcgag  
ccgctgctggcccagcaacacatagagggacactatcaggtggaccctcctgtttaaagccaaatgctgattcctggttgcgggtgctggg  
aatgtccatgaaggacatcgggtattatggatggtgacctctcgcctcataagacacaggatgacaggaacggccaggtagctgttgcga  
ggatagacgatgaggtcactgtgaaacgtctcaagaagcaaggaataaggctcagctgctcgggagaatagcaggttcaagccgatc  
gtggtggatctgcgacagcagctcttactatcagggccttggccgtgggtgtgatccgcaacggagattggctgggacgtcagttggagct  
cctcctaccgccagggctacggcctcgataatgccgcacgtgatggagcagcctctcagtaccagcattaacccgcaacgaccgcttc  
aacggtaattcccaacccactccgataactccgatgcagctctc gatgctatcactcagaccaacgattatggaagcgtaaatacatatggt  
atcctctctacttaccgcccagggctacgcaccttaatgaagcttccgtcgtcctcgtcctccgggtggcgccccccccgaccgctcctcc  
gtatgttgacagcagaccaatcaccgcccgtaccactcgaatctggtccaatggcgaactttggttactcagcgttgattacgatgccatg

gttgacgatttgctagcattgaatacacggacgctgtggatgtcaccacagttatgaccaatctgggattcgttctggatgtaacttctc  
cgacattaatacatacgaacagtgacctaggttaattaataaaatgaatcgtagatactgaaaaaccccgcaagttcacttcaactgtgcatcg  
tgcaccatctcaattctttcattatacatcgtttgcctctttatgtaactatactcctctaagttcaatcttggccatgtaacctctgatctataga  
atttttaaatagactagaattaatgccatctttttggacctaattctcatgaaaatataattacgagggcttattcagaagcttatcgataccgt  
cgactaaagccaaatagaaattatcagttctggcttaagttttaaaagtgatattatttattggttgtaaccaacaaaagaatgtaaataacta  
atacataattatgtagtttaagtttagcaacaaattgattttagctatattagctacttggttaataatagaatataatttttaaagataattcgtttt  
attgtcagggagtgagtttgcttaaaaactcgttttaattaa

#### T2A-Gal4DBD-Hsp70 Insertion Sequence

ggatccgagggccgcggcagcctgctgacctgcggcgatgtggaggagaacccgggcccattgctggagatccgcgcccttctcgc  
gccagcgcacaccgccctgcgcaccgaggtggccgagctggagcaggaggtgcagcgccctggagaacgaggtgagccagtacgag  
accgctacggcccctggcgggcggcgaaggctagcggaggaggtggtggaggtggaggtggaggtactagtagaagctgctgagta  
gtattgaacaagcgtgtgacatatgccgacttaagaagctgaagtgcagcaaggaaaagccgaagtgcgccaatgtcttaagaacaattg  
ggagtgccggctactcgccaaagcgaagcgaagcccttgacacgcgctcatttgactgaagtgagagtcgacctggagcgccttgagca  
gttgttctctcattttccccgtgaagacctgacatgatactgaagatggatagctccaagatattaaggccctgctcactggcctgtttgt  
caggataacgtcaacaaggatgccgtgacggaccgcttgcctcggaggacagatagccacttaccttgcggcagcatcgcacatcgc  
gctaccagcagtagtgaagaaagttcaataagggtcaacggcaactgacggatcgtaaaagcttategataaccgtcgaactaaagccaaa  
tagaaaattattcagttctcgcttaagttttaaaagtgatattattttggttgtaaccaacaaaagaatgtaaataactaatacataattatg  
tagtttaagtttagcaacaaattgattttagctatattagctacttggttaataatagaatataatttttaaagataattgcgttttattgtcaggg  
gtgagtttgcttaaaaactcgtttggatcc

#### T2A-p65AD-Hsp70 Insertion Sequence

ggatccgagggccgcggcagcctgctgacctgcggcgatgtggaggagaacccgggcccattgataaagcgaattaattcccagac  
ctcaaaaaagaagagaaaggtcgaattgggtccacgccgatggagttccagttaccctgccgatacggatgaccgtcaccgtatcgaag  
aaaagcggaaagcgaacctatgaacctcaagtccatcatgaaaaagttccccttctcgggcccacaggaccgcgccccccgccccgctc  
gtattgcggttcttcgcgcagcagtgccagcgtcccaaacccgcaccgcagccctaccgttcaacttctccttagcacgattaactatg  
atgagttccccacgatgggtgttcccagtggaacaaattcccaggcatcggcactggctcggccccaccgcaagtcctccccagggcgc  
cgctccggcaccggctcccgaatggtgagtgcttgccccaggccccgctccagtcctcgtgctggcgcctggacccccacaggca  
gttgccccctctgctccgaaaccaacgcagggcggcgaaggaacctgagcaggccctcttgcagcttcagttcagtgatgacgaagacttg  
ggagccctgctggtaacagcacagacctgccgtattaccgatctcgcacccgtggacaacagcagttcagcagctcttgaatcagg  
gaatcccggctgcacctcataccagagcccattgctgatggaataccggaggctatcacgcgactggtgaccggcgcacagcagca  
cccgatccagcccctgccccactgggtgccccgggtttgcccaatggcctcctcagcggcgatgaggatttctcagcatcgtgatatgg  
atttctccgcttctgctgagccagataagctccgctagcggaggaggtggtggaggtggaggtgaggtactagctggagatcaggccg  
ccttctggagcgcgagaacaccgccctggagaccgcgtggccgagctgcgccagcgcgtgcagcgcctgcgcaaccgcgtgagcc  
agtaccgcaccgctacggccccctggcgggcggcaagtaacctaggttaattaataaaatgaatcgtagatactgaaaaaccccgcaagt  
tcaacttcaactgtgcatcgtgcaccatctcaattctttcattatacatcgtttgcctctttatgtaactatactcctctaagttcaatcttggccat  
gtaacctctgatctatagaatttttaaatagactagaattaatgccatctttttggacctaaattctcatgaaaatataattacgagggcttattca  
gaagcttategataaccgtcgaactaaagccaaatagaattatcagttctggcttaagttttaaaagtgatattattttggttgtaaccaacca  
aaagaatgtaaataactaatacataattatgtagtttaagtttagcaacaaattgattttagctatattagctacttggttaataatagaatataatt  
atttaaagataattcgttttattgtcagggagtgagtttgcttaaaaactcgttttaattaa

#### T2A-dVP16AD-Hsp70 Insertion Sequence

ggatccgagggccgcggcagcctgctgacctgcggcgatgtggaggagaacccgggcccattgataaagcgaattaattcccagag  
cctcaaaaaagaagagaaaggtcgaattgggtaccgccccccccaccgacgtgctcctggcgatgagctgcacctggatggcgagg  
atgtggccatggcccacgccgatgccctggatgacttcgacctggatgctggcgatggcgacagccccggccccggcttacccccc  
acgatagcggccccctacggcgccctggacatggccgatttcagttcagcaaatgttcaccgacgccctgggcatcgtgagtagggc



gcgctagcggaggaggtggaggaggtggaggaggtgactagctgagatcgaggccgcttctggagcgcgagaacaccgccct  
ggagaccgcgctggccgagctgcccagcgcgtgagcgcctgcaaccgcgtgagccagctaccgacccgctacggccccctgg  
gcggcggcaagtaaccctaggttaattaataaaatgaatcgtagatactgaaaaaccccgcaagttcactcaactgtgcatcgtgaccatc  
caattctttcattatacatcgtttgcttctttatgtaactatactcctctaagttcaacttggccatgtaacctctgatctatagaattttta  
gactagaattaatgccatcttttttggacctaaattcttcatgaaaatatactacgaggcttattcagaagcttaccgataccgtcgactaaag  
ccaaatagaattattcagttctggcttaagttttaaaagtgatatttttttggttgtaaccaaccaaaagaatgtaataactaatacataat  
atgttagtttaagttgacaacaattgatttagctatattagctactggtaataataagaatataatttttaaagataatcgtttttatgtcagg  
gagtgagttgcttaaaaactcgttttaattaa

T2A-3X Gal80<sup>FLAG/HA/EGFP</sup>-Hsp70 Insertion Sequence

ggatccatggattacaacaaaaggagtagtggagtagcgggcccgaatgctgctccattcgcgtgggcttctgggattgaacgcggcta  
agggttgggccattaaaacgcattatccagccatactgcagctgagctcccagttccaaataacagcgtttattcccccaagatcagacgt  
ccattgcgacaattcagaggctgaagttgccaacgccacagctttccaacactcgagagcttcgctcgagctccacgatcgatattggt  
tgatcgcaatccagggtgcttcccactacgaggtgtaatgccctgctcgagtttcaagaacaatcctaactgaagtattgtttgtggaa  
tgggcactggcctgctcgcctgatcagggcgagctgatctataagccgctcgagagcggggcgtgcaacaataatcagctcgcaggg  
acgaaaagagcccgtacattttcgggcaaaaagagcttatttcccagggctacatcggcgataataatagcatcgagattgcaggtaacgga  
ggttggtacggttacgagcggccggtgaaaagcccgaatacattacgagatcggaaacggagttgatctggtgaccaccacgctcggtc  
acagatagatataatgcagtacatgaccagttcgtactcagccgatcaatgccatgggttttaacaacattccagaacaggagctcattgat  
gagaggggcaatcgcctggggcagcgggtccaaagactgtccagatcatcttctggtccagggcacgctgctcaacggaaatgttctg  
tgtcctgttcttaaggaggagcctacgaaaaagttcacaagaatctggtcatagatccatggtacaagggtgatctgaagctgg  
agggtgacgctggatttgcgaaatcctcgaatctcgttctgattattcgggcaccgcgccaatgattttcccctggccaatggtcagcagg  
caccctggaccccggctacgacgcaggcaaggagattatggagggtgatacctccgaaactacaacgcgacgttggtaataacaccg  
gctctaccagatcagcagatttccactcaacaccaagaaaatccccgagcttccatcgcagttcgaatgcaaggcttcgatttcgaagg  
ctttcccacctgatggatgcttgcctgatcgcctgattgaaagtgtctacaagtcgaatgatgggcagtagcctgaatgtttccaacat  
ctcccactactcgtttaccctacgatgtgcccgattacgccggcgattacaaggacgatgacgacaaggccaccaactcagcctgctga  
agcaggccggcgatgtggaggagaaccccggcccatggattacaacaaaaggagtagtggagtagcgggtgccgaatgctgctcccatt  
cgcgtgggctcgtgggattgaacgcggtaagggtgggccattaaaacgcattatccagccatactcagctgagctcccagttccaaat  
aacagcgtttattcccccaagatcgagacgtccattgcgacaattcagaggtgaagttgtccaacgccacagctttccaacactcgaga  
gcttcgctcgcagctccacgatcgatattgtgatcgaatccaggtgcttcccactacgaggtgtaatgccctgctcgagtttctgaa  
gaacaatcctaactgaagtattgtttggaatgggactggcctgctcgcctgatcagggcgagctgatctataaggccgctgcagagc  
ggggcgtgcaacaataatcagctcgcagggacgaaagagcccgtacattttcgggcaaaaagagcttattcccagggtcatcggcg  
atataatagcatcgagattgcaggtaacggaggttggtacggttacgagcggccggtgaaaagcccgaatacatttacgagatcggaaa  
cggagttgatctggtgaccaccacgttcggtcacacgatagatataatgcagtagatgaccagttcgtactcagccgatcaatgccatggt  
tttaacaacattccagaacaggagctcattgatgagaggggcaatcgcctggggcagcgggtcccaaagactgtcccagatcatcttgtt  
ccagggcacgctgctcaacggaaatgttctgtgtcctgttctttaaaggaggcaagcctacgaaaaagttcacaagaatctggtcatag  
atatccatggtacaagggtgatctgaagctggagggtgacgctggatttgcggaatctcgaatctcgttctgtattattcgggcaccgcg  
ccaatgattttcccctggccaatggtcagcagccaccttggaccccggctacgacgcaggcaaggagattatggaggtgatcacctccg  
aaactacaacgcgatcgttgtaataatacaccggctctaccagatcagcagatttccactcaacaccaagaaaatccccgagcttccatc  
gcagttcgaatgcaaggcttcgatttcgaaggctttcccacctgatggatgcttgccttgatctgcatcgcctgattgaaagtgtctacaagtcga  
atatgatgggcagtagcctgaatgtttccaacatctcccactactcgttatgcaaaaggtgaagaactgtttaccggagtagtcccgatattg  
gttgaactcagcggcagtgtaacggtcataaattcagtggtcggcgaggggtgagggcgacgccacatacggtaagctgacgttgaagt  
tcatatgaccacgggcaagctgcccgtgcatgcccgacgttggtcacgacgctgacgtatggtgtccagtgtttcagccgttaccgccat  
catatgaagcagcatgacttttcaagtcggcgatgccggagggatacgttcaagagaggaccattttcttcaaggatgacggcaactataa  
gacgcgagcggaggtgaaattgaaaggcagacacactgtaaccgtattgagttgaagggcattgattttaaggaggtggcaacattctgg  
gccataagttggaatacaactacaactgcataatgtgtatataatggcagataagcagaaaaacggaataaagggttaactcaagattcggc  
acaacatagaggacggttccgtgcaactgcagatcattaccaacagaacacaccattggagatggcccagttcttccagacaatcac

tacctttccacacagtccgcgttgagcaaggacccaatgaaaagcgggaccacatggtgtgctggagtttgaccgcagctggattac  
acacggcatggatgagctctacaaggaggccgcggcagcctgctgacctgcggcgatgtggaggagaaccccgggcccattggattac  
aacaaaaggagtagtgtagtacggtgccgaatgctgctcccattcgcgtgggcttcgtgggattgaacgcggctaagggtgggcccatta  
aaacgcattatccagccatactgcagctgagctcccagttccaaataacagcgtttatcccccaagatcgagacgtccattgcgacaattc  
agaggctgaagttgtccaacgccacagctttcccaacactcgagagcttcgcctcgagctccacgatcgatgatgattgtgatcgaatccag  
gtggcttcccactacgaggtgtaatagccctgctcgagtttccgaagaacaatcctaatactgaagattttgttgggaatggcactggcctg  
ctcgtcgtacagggcggagtcgatctataaggccgctcgagagcggggcgtgcaacaataatcagctcgagggacgaaagacccgt  
acattttgcgggcaaaaagacttatctcccagggtacatcggcgatataaatagcatcgagattgcaggtaacggaggttggtacggttac  
gagcggccgggtgaaaagcccgaatacatttacgagatcggaaacggagttgatctggtgaccaccacgttcggtcacacgatagatatat  
tgcagtacatgaccagttcgtacttcagccgatcaatgccatggtgttaacaacattccagaacaggagctcattgatgagaggggcaate  
gcctgggcccagcgggtcccaagactgtccagatcatctctgttccagggcacgctgctcaacggaaatgttctgtgctctgttccittaa  
gggaggcaagcctacgaaaagttcacaagaatctggtcatagatatccatggtacaaagggtgatctgaagctggagggtgacgctgg  
atttgcggaaatctcgaatctcgttctgtattatcgggacccgcgccaatgattttcccctggccaatggtcagcagggacccttgacccc  
ggctacgacgcaggcaaggagattatggaggtgtacacctccgaaactacaacgcgacgttggttaataatacaccggctctaccagagta  
tcagcgatttccactcaacaccaagaaaatccccgagcttccatcgcagttcgaatgcaaggcttcgatttcaaggcttcccaccctgat  
ggatgccttgatcttgcacgcctgattgaaagtgtctacaagtcgaatgatggcagttaccctgaatgttccaacatctcccactactcgc  
tttaataataaaatgaatcgtagatactgaaaaaccccgcaagttcacttcaactgtgcatcgtgcaccatcgaattttttcatttatacatcgtt  
tgccttctttatgtaactatactccttaagtttcaactcttgccatgtaacctctgatctatagaatttttaaatagactagaattaatgccatcttt  
tttggacctaattctcatgaaaatatactacgagggcttattcagaagcttatcgataccgtcgactaaagccaaatagaattattcagttct  
ggcttaagttttaaaagtatattttttggttgaaccaacaaaagaatgtaataactaatacataattatgttagtttaagttagcaaca  
aattgattttagctatattagctacttggttaataataagaatataatttttaagataatcgtttttattgtcagggagtgagttgcttaaaaact  
gtttggatcc

### **loxP2-attB2-SA of singlet donor pC-(loxP2-attB2-SA(0))**

*ctcgagataacttcgtataatgtatgctatacgaagttatcaattggcttattgggatttcaatttaagatgctgctaaataaagttagtcacttac  
ggactggggagggcaccctgcatcactcgcagaaatgcaattgatgtaggtcacggctcgaagccgcggtgcgggtgccagggcgtg  
cccttgggctccccgggcgctactccactcaccatctggtccatcatgatggtcactctagaagtcgatccaacatggcgacttgcctc  
atccccggcatgtttaaataactaattattcttgaactaatttaatacaaccgatttatctcttccgcaggtgggaggttccggtggaagcggga  
ggtagcggcggatccggaggtagcgggtggaagcggaggttccggcgaggttaagtattgaacaatggcatcaaatgccttcatcatcacta  
cccttagcccttaagaccccacaatgaccttaccactcagagaaaaagtaaatatgaaagcccatttgaacttcaagcttgcgaccatc  
atgatggaccagatgggtgaggtggagtacgcgcccggggagcccagggcacgccctggcaccgcaccgcggcttcgagaccgtg  
acctacatcatacaataatattcacaccctaaaaaacgaagctgcaatttgcatacaattatgccagagtaaaaattataattgttatt  
atttaaattgaaataacttcgtataatgtatgctatacgaagttat*

Note: the three phases of the pC-(loxP2-attB2-SA) constructs differ only in the short linker sequence between the splice acceptor and *Bam*H I restriction site. The short linker sequences are the same as those used in pT-GEM constructs.

### **Backbone of Triplet Donor Sequence: (lox2-attB2-SA-Hsp70)<sub>3</sub> of pC-(lox2-attB2-SA-Hsp70)<sub>3</sub>**

*ctcgagataacttcgtataaagatcctatacgaagttatcaattggcttattgggatttcaatttaagatgctgctaaataaagttagtcactta  
cggactggggagggcaccctgcatcactcgcagaaatgcaattgatgtaggtcacggctcgaagccgcggtgcgggtgccagggcgtg  
gcccttgggctccccgggcgctactccactcaccatctggtccatcatgatggtcactctagaagtcgatccaacatggcgacttgtc  
ccatccccggcatgtttaaataactaattattcttgaactaatttaatacaaccgatttatctcttccgcaggtgggaggttccggtggaagcg  
gaggtagcggcaccgggtgcatgcgcccggccaatgaatcgtagatactgaaaaaccccgcaagttcacttcaactgtgcatcgtgaccat  
ctcaattttttcatttatacatcgttttgccttctttatgtaactatactccttaagtttcaactcttgccatgtaacctctgatctatagaatttttaa*

atgactagaattaatgcccatcttttttggacctaaattctcatgaaaatatattacgagggcttattcagaagcttatcgataaccgtcgactaa  
agccaaatagaaattattcagttctggcttaagttttaaaagtgatatttttttgggtgtaaccaaccaaagaatgtaaataactaatacata  
attatgtagtttaagttagcaacaaattgatttagctatattagctacttggtaataatagaatataatttttaaagataattcgttttattgtca  
gggagtgagtttgcttaaaaactcgtttggaggtagcgggtggaagcggaggtccgggcgaggttaattgaacaatggcatcaaatgcct  
tcatcatcactacccttagcccttaagaccccacaatgaccttaccctcagagaaaaagtaaataatgaaagccatttgaacttctaagct  
tgtcgaccatcatgatggaccagatgggtgaggtggagtacgcgcccggggagcccaagggcacgccctggcaccgcaccgcggctt  
cgagaccgtgacctacatcatacaataaatattcacaccctaaaaacgaagctgcatttgcaattgcatacaattatgccagagtaaaaat  
tataattgtatttttaaatgaataacttcgtataaagtatcctatacgaagttatgtcgactgcagaatttcgagataacttcgtataaggt  
tactatacgaagttatgcatgacgcacagctgtaggactattttaaaattcttatttcgggggagagctgtaattgggtggatgatgagtcctta  
aaaaatcgttgtaacaaagggatgtaggtcacggctcgaagccgcgggtgcgggtgccagggcgtgcccttgggctccccgggcgcgt  
actccacctaccatctggctcatgatggctgactctagaagtcgatccaacatggcgacttgcctatccccggcatgtttaaatatact  
aattattctgaactaatttaatacaaccgatttatctctctccgcaggtggcggaggtccgggtggaagcggaggttagcggcactagtcgc  
gtggccggccaatgaatcgtagatactgaaaaacccgcaagttcacttcaactgtgcatcgtgcaccatctcaatttcttattatacatcgt  
tttgcctctttatgtaactatactcctctaagttcaactcttggccatgtaacctctgatctatagaatttttaaatgactagaattaatgccatctt  
tttttggacctaaattctcatgaaaatatattacgagggcttattcagaagcttatcgataaccgtcgactaaagccaaatagaattattcagttc  
tggcttaagttttaaaagtgatatttttttgggtgtaaccaaccaaagaatgtaaataactaatacataattatgtagtttaagtttagcaaca  
aattgatttttagctatattagctacttggtaataatagaatataatttttaaagataattcgttttattgtcagggagtgagttgcttaaaaactc  
gtttggaggtagcgggtggaagcggaggtccggaggttaattgaacaatggcatcaaatgccttcatcactacccttagcccttaa  
gacccacaatgaccttaccctcagagaaaaagtaaataatgaaagccatttgaacttctaagcttgcgaccatcatgatggaccagat  
gggtgaggtggagtacgcgcccggggagcccaagggcacgccctggcaccgcaccgcggcttcgagaccgtgacctacatccatag  
atttgttaatcggcttttggtatgcacaaaatgattgatattatgccaactgttttcttactgtagattagcttcaaaaaaatatcccataa  
cttcgtataaggtataactatacgaagttatgtcgactgcagaatttcgagataacttcgtataatgtatgctatacgaagtataatccctgt  
gctcagtggggtatttactataaaccacacatgctgagcctggcttattggcggctgaatcaccggagatacggcaaatggagcttgat  
gtaggtcacggctcgaagccgcgggtgcgggtgccagggcgtgcccttgggctccccgggcgcgtactccacctaccatctggctcat  
catgatggctgactctagaagtcgatccaacatggcgacttgcctatccccggcatgtttaaatataactaattattcttgaactaatttaataca  
ccgatttatctctcttccgcaggtcgggaggtccgggtggaagcggaggttagcggcgaattccgtacgggcgcgccaatgaatcgtagata  
ctgaaaaacccgcaagttcacttcaactgtgcatcgtgcaccatctcaatttcttattatacatcgttttgccttctttatgtaactatactcct  
ctaagttcaactcttggccatgtaacctctgatctatagaatttttaaatgactagaattaatgccatcttttttggacctaaattcttcatgaaaa  
tatattacgagggcttattcagaagcttatcgataaccgtcgactaaagccaaatagaattattcagttctggcttaagttttaaaagtgatattat  
ttatttgggtgtaaccaaccaaagaatgtaaataactaatacataattatgtagtttaagtttagcaacaaattgattttagctatattagctactt  
gtaataaataagaatataatttttaaagataattcgttttattgtcagggagtgagtttcttaaaaactcgtttggaggtagcgggtggaagcgg  
aggtccggcaggttaagttattgaacaatggcatcaaatgccttcatcactacccttagcccttaagaccccacaatgaccttaccctc  
agagaaaaagtaaataatgaaagccatttgaacttctaagcttgcgaccatcatgatggaccagatgggtgaggtggagtacgcgccc  
gggagcccaagggcacgccctggcaccgcaccgcggcttcgagaccgtgacctacatctcaatttttaatacccaatggagtaatgcaaa  
ttgttagcagattttcgaacttcccctgccagaacaaatcaaatgcaattaaaaccttgcgccataacttcgtataatgtatgctatacga  
agttatggatcc

## **Supplemental References**

Bischof, J., Maeda, R.K., Hediger, M., Karch, F., and Basler, K. (2007). An optimized transgenesis system for *Drosophila* using germ-line-specific phi C31 integrases. *PNAS* *104*, 3312-3317.

Diao, F.Q., and White, B.H. (2012). A Novel Approach for Directing Transgene Expression in *Drosophila*: T2A-Gal4 In-Frame Fusion. *Genetics* *190*, 1139-U1356.

Gao, S., Takemura, S.Y., Ting, C.Y., Huang, S., Lu, Z., Luan, H., Rister, J., Thum, A.S., Yang, M., Hong, S.T., *et al.* (2008). The neural substrate of spectral preference in *Drosophila*. *Neuron* *60*, 328-342.

Kitamoto, T., Wang, W., and Salvaterra, P.M. (1998). Structure and organization of the *Drosophila* cholinergic locus. *J Biol Chem* *273*, 2706-2713.

Kosman, D., Small, S., and Reinitz, J. (1998). Rapid preparation of a panel of polyclonal antibodies to *Drosophila* segmentation proteins. *Development genes and evolution* *208*, 290-294.

Kuzin, A., Kundu, M., Ekatomatis, A., Brody, T., and Odenwald, W.F. (2009). Conserved sequence block clustering and flanking inter-cluster flexibility delineate enhancers that regulate *nerfin-1* expression during *Drosophila* CNS development. *Gene Expr Patterns* *9*, 65-72.

Livet, J., Weissman, T.A., Kang, H.N., Draft, R.W., Lu, J., Bennis, R.A., Sanes, J.R., and Lichtman, J.W. (2007). Transgenic strategies for combinatorial expression of fluorescent proteins in the nervous system. *Nature* *450*, 56-+.

Luan, H., Lemon, W.C., Peabody, N.C., Pohl, J.B., Zelensky, P.K., Wang, D., Nitabach, M.N., Holmes, T.C., and White, B.H. (2006a). Functional dissection of a neuronal network required for cuticle tanning and wing expansion in *Drosophila*. *J Neurosci* *26*, 573-584.

Luan, H.J., Diao, F.Q., Peabody, N.C., and White, B.H. (2012). Command and Compensation in a Neuromodulatory Decision Network. *J Neurosci* *32*, 880-889.

Luan, H.J., Peabody, N.C., Vinson, C.R., and White, B.H. (2006b). Refined spatial manipulation of neuronal function by combinatorial restriction of transgene expression. *Neuron* *52*, 425-436.

Park, Y., Filippov, V., Gill, S.S., and Adams, M.E. (2002). Deletion of the ecdysis-triggering hormone gene leads to lethal ecdysis deficiency. *Development* *129*, 493-503.

Peabody, N.C., Diao, F., Luan, H., Wang, H., Dewey, E.M., Honegger, H.W., and White, B.H. (2008). Bursicon functions within the *Drosophila* CNS to modulate wing expansion behavior, hormone secretion, and cell death. *J Neurosci* *28*, 14379-14391.

Pfeiffer, B.D., Ngo, T.T., Hibbard, K.L., Murphy, C., Jenett, A., Truman, J.W., and Rubin, G.M. (2010). Refinement of tools for targeted gene expression in *Drosophila*. *Genetics* *186*, 735-755.

Ren, X., Sun, J., Housden, B.E., Hu, Y., Roesel, C., Lin, S., Liu, L.P., Yang, Z., Mao, D., Sun, L., *et al.* (2013). Optimized gene editing technology for *Drosophila melanogaster* using germ line-specific Cas9. *Proc Natl Acad Sci U S A* *110*, 19012-19017.

Riabinina, O., Luginbuhl, D., Marr, E., Liu, S., Wu, M.N., Luo, L., and Potter, C.J. (2015). Improved and expanded Q-system reagents for genetic manipulations. *Nat Methods* <http://dx.doi.org/10.1038/nmeth.3250>.

Sharma, Y., Cheung, U., Larsen, E.W., and Eberl, D.F. (2002). PPTGAL, a convenient Gal4 P-element vector for testing expression of enhancer fragments in *drosophila*. *Genesis* *34*, 115-118.

Siegal, M.L., and Hartl, D.L. (1996). Transgene coplacement and high efficiency site-specific recombination with the Cre/loxP system in *drosophila*. *Genetics* *144*, 715-726.

Venken, K.J., Schulze, K.L., Haelterman, N.A., Pan, H., He, Y., Evans-Holm, M., Carlson, J.W., Levis, R.W., Spradling, A.C., Hoskins, R.A., *et al.* (2011). MiMIC: a highly versatile transposon insertion resource for engineering *Drosophila melanogaster* genes. *Nat Methods* *8*, 737-743.
